1 **Demographic fluctuation of community-acquired antibiotic-resistant *Staphylococcus aureus***

2 **lineages: potential role of flimsy antibiotic exposure**

3 Claude-Alexandre Gustave<sup>1,2</sup>, Anne Tristan<sup>1,2</sup>, Patricia Martins-Simoes<sup>1,2</sup>, Marc Stegger<sup>3</sup>, Yvonne  
4 Benito<sup>1,2</sup>, Paal Skytt Andersen<sup>3,4</sup>, Michèle Bes<sup>1,2</sup>, Philippe Glaser<sup>5</sup>, Frédéric Laurent<sup>1,2</sup>, Thierry  
5 Wirth<sup>6,7</sup>, François Vandenesch<sup>1,2</sup>

6  
7 <sup>1</sup>CIRI, International Center for Infectiology Research, Lyon, France; Inserm U1111, Lyon, France;  
8 *Université Lyon 1*, Lyon, France; *Ecole Normale Supérieure de Lyon*, Lyon, France; CNRS  
9 UMR5308, Lyon, France; <sup>2</sup>*Centre National de Référence des Staphylocoques, Institut des Agents*  
10 *Infectieux, Hospices Civils de Lyon*, Lyon, France; <sup>3</sup>Department for Bacteria, Parasites and Fungi,  
11 Statens Serum Institut, Copenhagen, Denmark; <sup>4</sup>Department of Veterinary and Animal Sciences,  
12 Frederiksberg, Denmark; <sup>5</sup>*Institut Pasteur – AHP – Université Paris Sud, Unité Ecologie et*  
13 *Evolution de la Résistance aux Antibiotiques* Paris, France; CNRS UMR3525, Paris, France;  
14 <sup>6</sup>*Institut de Systématique, Evolution, Biodiversité (ISYEB - UMR 7205, CNRS, MNHN, UPMC,*  
15 *EPHE), Muséum National d'Histoire Naturelle, Sorbonne Universités*, Paris, France; <sup>7</sup>*Ecole*  
16 *Pratique des Hautes Etudes*, PSL Research University, Paris, France.

17

18 Running Title: Antibiotic exposure increases CA-MRSA fitness

19

20 Corresponding author: François Vandenesch, CIRI (International Center for Infectiology  
21 Research), Inserm U1111/CNRS UMR5308, Team “Staphylococcal pathogenesis”, Domaine de la  
22 BUIRE, 8 Rue Guillaume Paradin, 69372 Lyon cedex 08, FRANCE.

23 Email: francois.vandenesch@univ-lyon1.fr.

24 Conflict of Interest statement: The authors declare no conflict of interest.

25 Subject Categories: Microbial population and community ecology; Evolutionary genetics

26

27 **ABSTRACT**

28 Community-acquired (CA) –as opposed to hospital acquired- methicillin-resistant  
29 *Staphylococcus aureus* (MRSA) lineages arose worldwide during the 1990s. To determine which  
30 factors, including selective antibiotic pressure, govern the expansion of two major lineages of  
31 CA-MRSA, namely “USA300” in Northern America and the “European ST80” in North Africa,  
32 Europe and the Middle East, we explored virulence factor expression, and fitness levels with or  
33 without antibiotics. The sampled strains were collected in a temporal window representing  
34 various steps of the epidemics, reflecting predicted effective population size as inferred from  
35 whole genome analysis. In addition to slight variations in virulence factor expression and biofilm  
36 production that might influence the ecological niches of these lineages, competitive fitness  
37 experiments revealed that the biological cost of resistance to methicillin, fusidic-acid and  
38 fluoroquinolone is totally reversed in the presence of trace amount of antibiotics. Our results  
39 suggest that low-level antibiotics exposure in human and animal environments contributed to

40 the expansion of both European-ST80 and USA300 lineages in community setting. This surge  
41 was likely driven by antibiotic (ab)use promoting the accumulation of antibiotics as  
42 environmental pollutants. The current results provide a novel link between effective population  
43 size increase of a pathogen and a selective advantage conferred by antibiotic resistance.

44

## 45 **INTRODUCTION**

46 *Staphylococcus aureus* remains one of the most common causative agents of both nosocomial  
47 and community-acquired infections. It colonizes asymptotically about one third of the human  
48 population and may cause infections with outcomes ranging from mild to life-threatening  
49 (Lowy, 1998). Until the mid-1990's, methicillin-resistant *S. aureus* (MRSA) infections were  
50 reported almost exclusively from hospital settings and most hospital-associated MRSA (HA-  
51 MRSA) diseases resulted from a limited number of successful clones (Thurlow *et al.*, 2012).  
52 These HA-MRSA, which remained confined to healthcare settings, were exposed to a high  
53 antibiotic pressure among patients with frequent immunity impairment and/or invasive devices  
54 such as urinary/vascular catheters or mechanical ventilation (Chavez and Decker, 2008).  
55 Therefore, HA-MRSA were likely under strong positive selection within these healthcare-  
56 associated niches where the acquisition of resistance to multiple antibiotic families provided  
57 them with a major competitive advantage despite their impaired fitness. However, in the  
58 beginning of 2000's, MRSA infections began to be reported in healthy individuals without known  
59 risk factors or apparent connections to healthcare institutions (Chambers, 2001), (Vandenesch  
60 *et al.*, 2003). These community-acquired (CA)-MRSA strains had genetic backgrounds distinct

61 from the traditional HA-MRSA strains with specific lineages predominating in different  
62 continents such as the Sequence Type 8 (ST8) *SCCmecIVa* (standing for *staphylococcal cassette*  
63 *chromosome encoding methicillin resistance gene of type IVa*) pulsotype USA300 in the USA  
64 (abbreviated to “USA300” below), the ST80 *SCCmecIV* in Europe, North Africa and the Middle  
65 East (hereinafter referred to as “EU-ST80”), and the ST30 *SCCmecIV* in Oceania (Mediavilla *et al.*,  
66 2012). Some genetic features of these CA-MRSA were postulated to be major determinants of  
67 their selective advantages against HA-MRSA in community settings (David and Daum, 2010).  
68 Fitness impairment associated with the *SCCmec* mobile element is a well-described example;  
69 large *SCCmec* elements shared by HA-MRSA induced a stronger fitness decrease compared to  
70 small *SCCmec* of CA-MRSA (Ma *et al.*, 2002), the latter being therefore promoted under  
71 lightened antibiotic pressure outside of healthcare settings. Successful community spread of CA-  
72 MRSA has also been allegedly associated with ecological factors such as modifications of  
73 colonisation niches. This was illustrated by the hypothesis of a deleterious impact of anti-  
74 pneumococcal vaccines on nasal microbiota facilitating CA-MRSA colonization (Regev-Yochay *et*  
75 *al.*, 2006). Finally, the observation that CA-MRSA had apparently increased virulence for human  
76 (Li *et al.*, 2010) notably in skin infection, suggested that higher bacterial load associated with  
77 increased severity of cutaneous infections could promote dissemination between humans.

78 Regarding the population dynamics of CA-MRSA, recent phylogenetic studies, conducted on the  
79 USA300 (Glaser *et al.*, 2016) and the EU-ST80 (Stegger *et al.*, 2014) lineages, proposed two  
80 Bayesian evolutionary models inferring their population size through time among hundreds of  
81 isolates sampled from 1980’s to 2000’s. Those phylogenetic analyses strongly suggested that in



82 the transition from an MSSA lineage to a successful CA-MRSA clone, the USA300 lineage first  
83 became resistant to multiple antibiotics, acquired the arginine catabolic mobile element (ACME)  
84 which encodes factors promoting skin colonization and infection (Thurlow *et al.*, 2013), and  
85 subsequently acquired resistance to fluoroquinolones (Planet *et al.*, 2015). These two steps  
86 were associated with two successive phases of sharp demographic expansion of what is known  
87 as the USA300 North-American (NA) lineage as opposed to the Latin-American Variant (LV)  
88 which does not harbor ACME (Glaser *et al.*, 2016). A similar study, performed on the EU-ST80  
89 epidemic CA-MRSA lineage, depicted a clone derived from a Panton-Valentine (PVL)-positive  
90 methicillin-susceptible *S. aureus* (MSSA) ancestor from sub-Saharan Africa that dramatically  
91 expanded in the early 1990's once out of West Africa, upon acquisition of the SCCmec element,  
92 the plasmid-encoded fusidic-acid resistance (*fusB*) and four canonical SNPs including a non-  
93 synonymous mutation in the accessory gene regulator C (*agrC*) (Stegger *et al.*, 2014), a major  
94 virulence regulator in *S. aureus* (Reynolds and Wigneshweraraj, 2011). However, for both the  
95 USA300 and the EU-ST80 lineage it remains to be demonstrated that the identified genetic  
96 events, which correlate with the demographic expansion, are causally related with population  
97 size variations. In order to answer these questions, we explored fitness and virulence factor  
98 expression of strains selected at various evolutionary and temporal stages of the predicted  
99 population size inferred through Bayesian coalescence models.

100

## 101 **MATERIALS & METHODS**

102 *Strain selection.*

103 Infection-related strain selection among the CA-MRSA clones “USA300” and “EU-ST80” was  
104 determined by two previously published phylogenetic studies (Glaser *et al.*, 2016), (Stegger *et al.*,  
105 2014). All isolates were stored at -20°C at the National Reference Center for Staphylococci  
106 (NRCS - HCL, Lyon), on cryobeads. Prior whole genome sequencing and Bayesian analysis of all  
107 strains enabled their assignment to an evolution phase of these clones; thus isolates of the two  
108 lineages were selected at various temporal steps of their inferred population dynamics as  
109 follows: for the CA-MRSA USA300 lineage, ten clinical strains plus one reference strain were  
110 included (Fig. 1a & Table 1): (i) two strains corresponding to the most recent common ancestor  
111 of the USA300 clone, lacking the ACME sequence (Basal USA300 1 & 2), (ii) four strains from the  
112 early expansion phase characterized by ACME and SCC*mec* acquisition (Derived USA300 1, 2, 3  
113 & 4), (iii) four strains from the most recent evolutionary phase subsequent to fluoroquinolones  
114 resistance acquisition (Derived USA300 5, 6, 7 & 8). For the EU-ST80 lineage, eleven clinical  
115 isolates plus one reference strain were selected (Fig. 1b & Table 1): (i) five strains from the basal  
116 clade with a high genetic proximity with their hypothetical common MSSA ancestor from Sub-  
117 Saharan Western Africa (Basal MSSA 1, 2, 3, 4 & 5), (ii) two MRSA strains from the derived clade  
118 isolated from a patient from Maghreb (Derived MRSA 1 & 2), (iii) two MRSA strains from the  
119 derived clade isolated on patients from Europe (Derived MRSA 3 & 4), (iv) two MRSA strains  
120 from the derived clade and associated with the stabilization/decline phase of the lineage  
121 (Derived MRSA 5 & 6); The competitive strain pairs are summarized in Table S1. Reference strain

122 for the USA300 and EU-ST80 lineages were SF8300-LUG2295 and HT20020209-LUG1799  
123 respectively (Table 1).

#### 124 *Construction of agrC mutant.*

125 The *agrC* locus of one basal MSSA of the ST80 lineage (Basal MSSA 3) (Fig. 1b & Table 1) was  
126 mutated by allelic replacement to confer the sequence carried by isolates of the derived clade  
127 (isoleucine instead of leucine at position 184). This mutation was obtained by using pMAD  
128 (Arnaud *et al.*, 2004). Two *agrC* DNA fragments flanking the *agrC* target region were amplified  
129 from a wild type strain using *agrC*2912/*agrC*555 and *agrC*544/*agrC*4238 primers respectively  
130 (Table S2). DNA fragments were then blunt-ended by *ScaI* and *PvuII* restriction enzymes, before  
131 being ligated and amplified using external primers *agrC*2912/*agrC*4238. The resulting DNA  
132 fragment corresponding to an *agrC* encoding sequence for the mutated amino-acid I184 was  
133 restricted by *XhoI* and *PvuII* and cloned in pMAD linearized by *Sall* and *SmaI*. The resulting  
134 plasmid, pLUG1166, was electroporated into RN4220, and then into Basal MSSA 3.  
135 Transformants were grown at non-permissive temperature (42°C), to select for cells with  
136 chromosome-integrated plasmid by homologous recombination. Successful double crossover  
137 mutants were subsequently selected on X-gal agar plates after single colony culture at 30°C for  
138 10 generations. PCR amplifications and sequencing were used to confirm the mutation of *agrC*  
139 in the resulting strain LUG2417 designated “Lab mutated basal MSSA” (Table 1).

#### 140 *RNA extraction from S. aureus.*

141 Brain-Heart Infusion broth (BHI) was inoculated with an overnight culture to an initial OD<sub>600nm</sub> of  
142 0.05 and grown up on aerated Erlenmeyer flask to the end of exponential phase (6h) at 37°C

143 under agitation (200 rpm). One milliliter of bacterial suspension was harvested and  
144 concentration adjusted to an  $OD_{600nm} = 1.0$ . Bacteria were washed in 10 mM Tris buffer and  
145 treated with lysostaphin and  $\beta$ -mercaptoethanol. RNAs were extracted with the RNeasy Plus  
146 Mini Kit<sup>®</sup> (Qiagen), quantified by spectrophotometry and stored at  $-80^{\circ}C$ . This process was  
147 repeated on three different days for biological replicates.

#### 148 *RNA quantification by real-time PCR.*

149 A random-primers based reverse transcription of  $1\mu g$  of RNA was performed with the A3500  
150 Reverse Transcription System Kit (Promega), followed by quantitative real-time PCR on cDNA  
151 using the FastStart Essential DNA Green Master kit (Roche) and the LightCycler<sup>®</sup> Nano (Roche).  
152 As previously described (Li *et al.*, 2010), we targeted five virulence genes (*RNAIII*, *lukS-PV*, *hla*,  
153 *hlgC*, *psmA*) and the housekeeping gene *gyrB* for normalization. Gene expression levels were  
154 compared between our clinical isolates and against the reference strains (SF8300-LUG2295 for  
155 the USA300 clone and HT20020209-LUG1799 for the EU-ST80 clone); levels were expressed as  
156 n-fold differences relative to reference strains or an isolate from another evolutionary phase.  
157 These qRT-PCR were performed as technical triplicates (three RNA quantification per RNA  
158 sample), on RNA obtained from three biological replicates (three independent cultures and  
159 extractions per strain).

#### 160 *Biofilm production assay.*

161 Each isolate was incubated overnight on blood agar (Columbia) at  $35^{\circ}C$  under ambient air. Three  
162 colonies were transferred into 9mL of BHI and incubated with agitation (200 rpm) overnight at

163 35°C under ambient air. Bacterial suspensions were then placed in a 96-well plate and incubated  
164 at 35°C under ambient air for, 24 and 48h respectively. Biofilm production was assessed by  
165 spectrophotometry after well drying and crystal violet fixation. *S. aureus* laboratory strains  
166 SH1000 was added as a positive control (Horsburgh *et al.*, 2002), (O'Neill, 2010), *S. epidermidis*  
167 ATCC12228 (Zhang *et al.*, 2003) and *S. carnosus* TM300 (Rosenstein *et al.*, 2009) as negative  
168 controls of adhesion. Biofilm experiments were performed as technical replicates (three wells  
169 per strain) and biological replicates (three independent plate series).

#### 170 *MIC determination.*

171 In order to adjust their concentrations in selective media and broth used for sub-inhibitory  
172 antibiotic pressure, MIC of second line antibiotics were measured by E-tests on Mueller-Hinton  
173 agar according to EUCAST specifications.

#### 174 *Crude doubling time.*

175 Isolates growth curves were determined from BHI cultures incubated in 96-well plates for 24  
176 hours at 37°C with continuous optical density monitoring at 600nm (Tecan Infinite® 200 PRO).  
177 Each strain was inoculated in three independent wells (technical replicate), and the experiment  
178 was repeated on three different days (biological replicate). Doubling times were calculated by  
179 graphical method with the Log-transformed optical density data of the exponential growth  
180 phase.

#### 181 *Competitive fitness.*

182 Each strain to be tested in a competitive pair was adjusted to an  $OD_{600nm} = 1$ , then 3 mL of a  $1/100$   
183 dilution in BHI of each strain was mixed in a glass tube. For some experiments ofloxacin,  
184 ceftriaxone, or fusidic acid were added at final concentrations corresponding to  $1/4$  to  $1/100$  of the  
185 susceptible strain's MIC. Tubes were incubated at 35°C in aerobic atmosphere under agitation  
186 (200 rpm) for 22 +/- 2h, and 50 µL were transferred daily for 21 days to a fresh tube containing  
187 3 mL of BHI. The proportion of each strain in the competitive mix was monitored daily with  
188 differential colony count based on selective agar inoculated with a calibrated amount of  
189 competitive mix (Spiral System® - Interscience) followed by aerobic incubation for 24h at 37°.  
190 For MSSA vs MRSA couples, we used the ChromAgar® medium (i2A, France) allowing for growth  
191 of both strains (total count) and the ChromID-MRSA® medium (BioMérieux, France) for MRSA  
192 colony count. For the USA300 clone, where all isolates were MRSA, we used second line  
193 antibiotics resistance for strain discrimination. Therefore, differential colony counts were  
194 performed with simultaneous inoculation of a brain-heart agar (BHA) and a BHA with ofloxacin  
195 (2 µg/mL, i.e. x5 above sensitive strain MIC, x6 below resistant strain MIC). Similarly, for MRSA  
196 vs MRSA pairs belonging to the EU-ST80 lineage, a combination of BHA and BHA with  
197 tetracycline (1 µg/mL, x8 above sensitive strain MIC, x8 below resistant strain MIC) was used.  
198 Strain quantifications calculated from colony counts on selective agar were confirmed by  
199 quantitative PCR targeting discriminant genes (*mecA* for MSSA versus MRSA, *griA* for  
200 fluoroquinolones sensitive versus fluoroquinolones resistant, *tetK* for tetracycline sensitive  
201 versus tetracycline resistant, or *arcA*-ACME for ACME negative versus ACME positive strains)  
202 carried by one of the strains in the competitive pair. This approach was used to rule out a

203 growth inhibition bias on selective medium. This was also the only strain quantification method  
204 usable for the EU-ST80 Basal MSSA 1 in competition with its *agrC* derivative obtained by allelic  
205 replacement. Strain proportions were determined with a L184I-specific set of primers (Table  
206 S2). All the PCRs were performed at days 0, 7, 14 and 21. Continuous competitive cultures were  
207 performed on three independent series (biological triplicates), each colony count or qPCR was  
208 performed on three technical triplicates. For all strains pairs tested, one of the strains was  
209 eventually reduced to a trace level, so no statistical test was required for strains proportions  
210 comparison.

211

## 212 **RESULTS**

213 *Growth rate along the phylogeny.*

214 Previous studies showed that CA-MRSA grew significantly faster than HA-MRSA, a property that  
215 may be a prerequisite for CA-MRSA, in the absence of antibiotic pressure, to achieve successful  
216 colonization of humans by outcompeting the numerous bacterial species in the human  
217 environment outside the hospital setting (Okuma *et al.*, 2002). We thus tested whether growth  
218 rate assessed by doubling-time varied between isolates of USA300 and EU-ST80 CA-MRSA  
219 lineages selected at various temporal steps of their Bayesian demography (Fig. 1 and Table 1).  
220 The experiment performed on ten USA300 isolates pointed out the impact of ACME acquisition  
221 on doubling time shortening (Derived USA300 1 or 2 versus Basal USA300 1 or 2, Mann-Whitney  
222 test,  $P = 0.029$ ) (Fig. 2a). Within the derived clade corresponding to the epidemic phase, crude

223 fitness appeared to be fading as we observed significant increase of doubling time along the  
224 phylogeny as shown by intraclade comparisons (Mann-Whitney test,  $P = 0.029$  for all  
225 comparisons) (Fig. 2a). Each doubling time rise appeared to be related to a new acquisition of  
226 antibiotics resistance, namely aminoglycosides and macrolides, then fluoroquinolones, followed  
227 by tetracyclines (Fig. 2a and Table 1). Among the twelve strains belonging to the EU-ST80 CA-  
228 MRSA lineage that were tested, the shortest doubling times were observed for the “basal clade”  
229 isolates (interclade comparison, Mann-Whitney test,  $P = 0.029$ ) (Fig. 2b). Within each clade  
230 (basal and derived), we observed a decreasing crude fitness along the phylogeny as shown by  
231 increasing of doubling times (intraclade comparisons, Mann-Whitney test,  $P = 0.029$  for all  
232 comparisons) (Fig. 2b). Like for USA300 strains, antibiotics resistance appeared to be a major  
233 determining factor of doubling time lengthening as shown by interclade comparison (Basal  
234 MSSA vs Derived MRSA, Mann-Whitney test,  $P = 0.029$ ), and by intraclade comparisons  
235 revealing longer doubling times associated with new acquisition of antibiotics resistance,  
236 namely tetracyclines within the basal clade of MSSA strains; whereas in the derived clade,  
237 fitness impairments resulted from the consecutive acquisition of resistance to beta-lactams,  
238 fusidic acid, aminoglycosides, and finally tetracyclines and macrolides for the most recent  
239 isolates (Mann-Whitney test,  $P = 0.029$  for all comparisons) (Fig. 2b and Table 1). At this stage,  
240 as epidemic strains (from derived clades) displayed the longest doubling times, we concluded  
241 that crude *in vitro* fitness did not explain the evolutionary dynamic of the two lineages. We  
242 therefore investigated other features related to host interaction and antibiotic pressure that  
243 could explain the demography of both lineages.



244

245 *Expression of core-genome encoded virulence factors along the lineages' evolutionary history.*

246 Previous studies revealed that overexpression of core-genome encoded virulence factors was a

247 common feature of CA-MRSA, a characteristic that has been proposed to contribute to the

248 expansion of these lineages (Li *et al.*, 2010). We therefore tested whether variations in the

249 expression of core genome encoded virulence factors along the Bayesian demographic models

250 could be observed (Fig. 1). To this end, RT-PCRs targeting virulence factors of the core- ( $\alpha$ -toxin,

251 PSM $\alpha$ ,  $\gamma$ -toxin) and accessory-genome (*LukSF-PV*), as well as the major regulator (*agr-RNAIII*),

252 were performed after *in vitro* post-exponential growth as previously described (Li *et al.*, 2010).

253 Among the USA300 CA-MRSA isolates, despite an outlier strain with no measurable expression

254 of *hla*, no major variations were detected in expression levels of the targeted virulence factors

255 (above the accepted 2-fold level generally considered as a minimum biological relevant variation

256 in RT-PCR approaches) between the strains representing the various steps of the demography

257 (Fig. 3a). This lack of significant differences was observed by either using an ancestral strain

258 (Basal USA300 1) or the reference strain SF8300 as comparators (Fig. 3a). For the EU-ST80

259 lineage, most of the targeted virulence factors studied showed variation in expression below -

260 or close to - two-fold, between ancestral and derived isolates with the exceptions of i) *psma*

261 increasing by 3 - 3.5-fold in two isolates from the evolutionary-derived clade (designated

262 derived MRSA 2 and 5), and ii) *lukSF-PV* increasing by a factor of 2.8-fold in one isolate (derived

263 MRSA 3) (Fig. 3b). In addition, expression of RNAIII, the *agr*-related regulatory RNA, was slightly

264 increased among isolates of the derived clade (reaching a 2.1-fold increase for one strain)  
265 compared to the basal clade (Fig. 3b).

266 All the EU-ST80 isolates from the derived clade harbor an L184I mutation in the extracellular  
267 loop of the AgrC receptor (Stegger *et al.*, 2014), a mutation that may have a functional impact  
268 on Agr signalling and expression of *agr*-RNAIII. To further investigate this point, an ancestral  
269 ST80 (AgrC L184) was engineered by allelic replacement to carry the L184I substitution and was  
270 then tested (as “Lab Mutated Basal MSSA”) for quantification of RNAIII and virulence factor  
271 expression. Compared to wild type (L184), the mutated (L184I) isogenic derivative (Lab Mutated  
272 Basal MSSA) showed a slight enhancement of RNAIII expression, but below the level of 2 (Fig.  
273 3b). This mutation had no significant impact on virulence gene expression, except a mild 2.2-fold  
274 increase in *psmA* expression (Fig. 3b).

275

276 *Biofilm production.*

277 The detection of a slight difference in RNAIII production associated with the *agrC* mutation in  
278 the EU-ST80 lineage prompted us to test whether it could translate into differences in biofilm  
279 production. After 48 hours of growth, ancestral MSSA strains displayed a higher production of  
280 biofilm compared to derived MRSA strains carrying the L184I AgrC substitution ( $P = 0.0002$ ) (Fig.  
281 4). The role of AgrC L184I substitution in this phenotypic difference was confirmed by  
282 comparing the ancestral ST80 (AgrC L184) with its isogenic derivative (L184I), the latter showing  
283 a significant reduction of biofilm production ( $P < 0.0001$ ). Importantly, the AgrC L184I mutation  
284 had no impact on crude fitness since doubling times of Lab Mutated Basal MSSA and its wild

285 type parental strain were similar (Fig. 2b). Therefore, differences observed in biofilm production  
286 were not due to growth variations but rather actual differences in biofilm production.

287

288 *Competitive fitness along the phylogeny.*

289 Doubling times comparisons used for crude fitness assessment highlighted fitness modulations  
290 along the phylogeny that did not match the Bayesian models inferred for both clones (Fig. 1). To  
291 better address this issue, we conducted a competitive fitness experiment in more stringent  
292 conditions based on continuous co-cultures for 21 days with isolates belonging to each phase of  
293 these lineages' evolution. Competitive strains pairs were designed in order to assess each  
294 evolutionary breakpoint identified in their inferred Bayesian phylogenic models (Glaser *et al.*,  
295 2016), (Stegger *et al.*, 2014), (Tables 1 & S1). Moreover, since our assessment of crude doubling  
296 times identified the acquisition of antibiotics resistance as a major determinant of fitness  
297 alteration, we tested the impact of sub-inhibitory concentrations of antibiotics on competitive  
298 fitness of these isolates. Within the USA300 lineage, the acquisition of ACME was associated  
299 with an increased fitness: during continuous competitive culture, ACME-positive MRSA strains  
300 outcompeted ACME-negative MRSA strains (Fig. 5a). This confirmed the results obtained by  
301 crude fitness assessment where shorter doubling-times were obtained with ACME-positive  
302 strains compared to ACME-negative ones (Fig. 2a). However, this fitness enhancement was  
303 progressively abolished along the phylogeny with the acquisition of fluoroquinolone (FQ)  
304 resistance; competitive fitness dropped even below the level observed prior to ACME  
305 acquisition: FQ-resistant ACME-positive strain was outcompeted by both FQ-susceptible ACME-

306 positive or -negative strains (Fig. 5b & c). Same results were obtained with a competition  
307 between the FQ-resistant strain (Derived USA300 5) and another FQ-susceptible isolate (Derived  
308 USA300 4) (data not shown). Altogether these results indicate that ACME enhances fitness but is  
309 insufficient to compensate for the fitness cost of FQ resistance.

310 To assess whether the fitness cost of resistance could be reversed in the presence of trace  
311 amounts of antibiotics that could be present in the environment (Okuma *et al.*, 2002), (Gothwal  
312 and Shashidhar, 2015), competitive cultures were performed at various sub-inhibitory  
313 concentrations of antibiotics. The antibiotics chosen were those those for which resistance  
314 acquisition correlate with noticeable variation in effective population size of the lineages (beta-  
315 lactams, fusidic acid for EU-ST80, and fluoroquinolones for USA300). Strikingly, even extremely  
316 low FQ concentration ( $1/_{100}$  of the FQ-susceptible strain's MIC, 0.0038  $\mu\text{g}/\text{mL}$ ) was sufficient to  
317 confer a strong selective advantage of FQ-resistant ACME-positive strain toward FQ-susceptible  
318 ACME-positive strain (Fig. 6). Similar analyses performed on the EU-ST80 strains also confirmed  
319 the results obtained during doubling times assessment suggesting that the major factor ruling  
320 the fitness downfall along the phylogeny was not the *AgrC* L184I but the acquisition of  
321 *SCCmec/fusB* and further extended antibiotics resistance. In competitive culture assays, the  
322 laboratory engineered *agrC* mutation did not translate into fitness impairment after 21 days of  
323 competitive culture with its wild type progenitor (Fig. 7a), whilst competitive culture of the  
324 clinical strains confirmed the strong fitness reduction of the derived MRSA isolates compared to  
325 the ancestral MSSA in favor of a fitness cost of antibiotics acquisition (the most premature being  
326 *SCCmec* and *fusB*) in the absence of antibiotics (Fig. 7b). Similar results were obtained with Basal

327 MSSA 4 versus Derived MRSA 3 (data not shown). The same competition performed in the  
328 presence of sub-inhibitory concentration of beta-lactam or fusidic acid totally reversed the  
329 result with a strong advantage of the MRSA even at extremely low concentrations ( $1/100$  of MSSA  
330 Ceftriaxone MIC, 0.03  $\mu\text{g}/\text{mL}$ , and  $1/100$  of MSSA fusidic acid MIC, 0.0009  $\mu\text{g}/\text{mL}$ ) (Fig. 7c & d).  
331 The same results were obtained with antibiotics concentrations of  $1/16$  and  $1/32$  of their MICs and  
332 with the couple Basal MSSA 4 versus Derived MRSA 3 (data not shown).

333

## 334 **DISCUSSION**

335 Polyphyletic CA-MRSA emergence and spread at the end of the 20<sup>th</sup> century (Vandenesch *et al.*,  
336 2003), (Tristan *et al.*, 2007), remains a challenging issue. As pointed out by A-C. Uhlemann, “our  
337 understanding of how a clone [such as USA300 or EU-ST80] became established as an endemic  
338 pathogen within communities remains limited” (Uhlemann *et al.*, 2014). Increased expression of  
339 core-genome encoded virulence factors has been shown to be a common feature of CA-MRSA  
340 (Li *et al.*, 2010); we have investigated whether such characteristics varied along the longitudinal  
341 short-term evolution of CA-MRSA. However, by assessing transcription of virulence factors  
342 previously described as overexpressed among CA-MRSA lineages (Li *et al.*, 2010), we could  
343 detect only minor variation (ca. 1.5-fold increase) in virulence factor expression between  
344 USA300 strains when comparing ancestral and derived isolates of the North American clone  
345 (Fig. 3a); we cannot rule out however that, at the population level, these minor increases in  
346 virulence factor expression enhanced the success of the lineage, for instance by increasing

347 cutaneous infection rate (the most common infections caused by *S.aureus*) and thus human-to-  
348 human transmission by skin contact as observed in prisons, sport team or men-having-sex-with-  
349 men (Planet *et al.*, 2015). Within this USA300 clone, 20 SNPs were identified for being under  
350 positive selection along successful evolution of this lineage (Glaser *et al.*, 2016); however, all the  
351 derived isolates assessed for doubling time carried these 20 SNPs. Therefore, despite being  
352 under positive selection they could not be reliable determinants of crude fitness evolution of  
353 the derived clade isolates as competitive fitness impairment observed along the phylogeny  
354 could not be explained by these genetic variations. Thus, the major variable feature of USA300  
355 along the demography was the acquisition of ACME which is a now well-characterized mobile  
356 genetic element (MGE) acquired from *S. epidermidis* by horizontal gene transfer (Diep *et al.*,  
357 2006), (Pi *et al.*, 2009), (Uhlemann *et al.*, 2014). Its multiple functions in resistance to acidic pH  
358 which enhances skin colonization, and as a factor promoting resistance to skin innate-immune  
359 defences (Thurlow *et al.*, 2012) makes it a very plausible contributor of the USA300 expansion  
360 (Planet, 2017). This is further strengthened by our findings of a shorter doubling-time of strains  
361 carrying ACME (Fig. 2a). In the case of EU-ST80, analysis of virulence factor expression along the  
362 demographical steps of the lineage showed that two derived isolates had a two-fold increase in  
363 *psma* expression and another one had a 2.5-fold increase in PVL expression when compared to  
364 the ancestral isolates. As previously described (Stegger *et al.*, 2014), isolates of the basal and  
365 derived clades of this lineage were discriminated by four canonical SNPs. One was located in a  
366 non-coding region, two were synonymous SNPs, and one was a non-synonymous SNP located in  
367 *agrC*, the major virulence factor regulator involved in quorum sensing and biofilm production.

368 We focused our attention on this SNP located in the *agrC* gene, because of its potential  
369 association to fitness and colonization ability. This SNP resulted in a L184I amino acid change in  
370 the extracellular loop of the AgrC receptor (Stegger *et al.*, 2014) shared by all EU-ST80 isolates  
371 belonging to the derived clade. To investigate this point further, an ancestral ST80 (AgrC L184)  
372 was engineered by allelic replacement to carry the L184I substitution. Despite a slight increase  
373 of doubling time compared to its parental strain, the L184I change in AgrC did not translate into  
374 significant crude fitness variation (Mann-Whitney test,  $P = 0.343$ ). Assessment of virulence  
375 factor expression revealed a two-fold increase of *psmA* in the Lab Mutated basal MSSA  
376 compared to its parental wild-type strain (Fig. 3b). AgrC L184I could therefore have a moderate  
377 impact on virulence. We further detected a strong and significant decrease in biofilm production  
378 associated with the AgrC L184I mutation (Fig. 4). Assessing which of these phenotypes (slight  
379 increase in PSM $\alpha$  or PVL, strong decrease in biofilm) was under selection remains speculative  
380 because they could be strongly dependent on the ecosystem in which selection has occurred.  
381 However, little is known regarding these ecological conditions since the current model for CA-  
382 MRSA ST80 lineage expansion places the acquisition of the AgrC L184I mutation in the early  
383 1990s in strains originating from Sub-Saharan Western Africa, concomitantly with the  
384 acquisition of *SCCmecIV* and *fusB* (Stegger *et al.*, 2014). Alternatively, the AgrC L184I  
385 substitution might be a non-adaptive sequel – a genetic drift – parallel to the acquisition of  
386 *SCCmecIV* and *fusB*. Importantly, antibiotic resistances were associated with demographic  
387 expansion of EU-ST80 (acquisition of *SCCmecIV* and *fusB*) and also North American USA300  
388 (acquisition of *SCCmec* and fluoroquinolone resistance) (Fig. 1) (Stegger *et al.*, 2014), (Glaser *et*

389 *al.*, 2016). These resistance acquisitions were associated with a significant fitness cost as  
390 indicated by both extended doubling-time of the derived isolates (Fig. 2) and by the results of  
391 competition experiments where derived isolates were outcompeted by their basal counterparts  
392 (Fig. 5-7). These observations were in accordance with the classical fitness costs associated with  
393 *de novo* antibiotic resistance, specifically those selected at high antibiotic concentration  
394 (Martinez, 2009), (Andersson and Hughes, 2014). Conversely, they did not match the Bayesian  
395 evolutionary models of these lineages as strains belonging to the epidemic phase (derived  
396 clade) displayed the lowest *in vitro* competitive fitness, with each step of fitness decrease being  
397 associated with new acquisition of antibiotic resistance (Fig. 2, Table 1). However, the most  
398 striking observation was that extremely low concentrations of antibiotics (those for which  
399 resistance acquisition correspond to demographic expansion of the two lineages), totally  
400 reversed this fitness cost. Since both USA300 and EU-ST80 likely emerged in low income  
401 populations (Vandenesch *et al.*, 2003), (Martinez, 2009), (Planet, 2017), the role of antibiotic  
402 selective pressure was not initially considered to be the major trait under positive selection.  
403 However, increasing number of reports reveals the escalation of antibiotic as environmental  
404 pollutants originating from hospital wastewater, bulk drug producer wastewater and unused  
405 antibiotics dumped in landfills in countries without solid take-back programs (Naimi *et al.*,  
406 2003), (Thurlow *et al.*, 2012), (Larsson, 2014), (Gothwal and Shashidhar, 2015), (See *et al.*,  
407 2017). From these sources, in which antibiotics such as fluoroquinolones can reach  
408 concentrations ranging from 3 ng/L to 240 µg/L (Van Doorslaer *et al.*, 2014), antibiotics are  
409 disseminated in various environmental matrices such as surface water, soil, sediments, and



410 eventually living organism including livestock (Van Doorslaer *et al.*, 2014). Hence, community  
411 settings, even in remote populations, can be exposed to low-level concentrations of various  
412 antibiotics that could have promoted the expansion of CA-MRSA at least by enriching for  
413 resistant bacteria (Andersson and Hughes, 2014), if not selecting for de novo resistance, the  
414 latter being typically associated with no fitness cost (Gullberg *et al.*, 2011), (Andersson and  
415 Hughes, 2014), (Westhoff *et al.*, 2017). Here, we demonstrate with competition experiments  
416 that the biological cost of antibiotic resistance (to beta-lactams, fusidic-acid and  
417 fluoroquinolone) is entirely reversed in the presence of trace amounts of antibiotics. Previous  
418 studies based on multidrug resistant plasmids showed that, for specific combinations of drugs,  
419 each new compound added, lowered the minimal selective concentration of the others  
420 (Gullberg *et al.*, 2014). However antibiotic resistance acquisitions (both by horizontal transfer of  
421 resistance genes and by mutations) are the genetic events that best match the variation of the  
422 demography in both lineages (Fig. 1a & b). Altogether, our findings support a model of antibiotic  
423 use, misuse and pollution as a major driving force for the emergence and expansion of CA-  
424 MRSA. In conclusion, CA-MRSA dynamics appear to be ruled by a complex interplay between  
425 resistance, virulence and fitness cost in which the contribution of anthropogenic activities is  
426 substantial.

427

428 **ACKNOWLEDGEMENTS**

429 We thank Alex Van Belkum for fruitful discussion, and the technicians and engineers of the  
430 French National Reference Center for Staphylococci for their skilful contribution. This work was  
431 not supported by specific grants. The salaries (C-A. G., A. T., P. M-S., Y. B., M. B., F. L., F. V.) were  
432 supported by the University of Lyon, *Hôpitaux de Lyon* and by *Santé Publique France* under the  
433 funding of the French National Reference Center for Staphylococci. The funders had no role in  
434 study design, data collection and interpretation, or the decision to submit the work for  
435 publication.

436

437 **CONFLICT OF INTEREST**

438 The authors declare no conflict of interest.

439

440 Supplementary information is available at the ISME Journal's website

441

## 442 **REFERENCES**

- 443 Andersson DI, Hughes D. (2014). Microbiological effects of sublethal levels of antibiotics. *Nat*  
444 *Rev Microbiol* **12**: 465–478.
- 445 Arnaud M, Chastanet A, Débarbouillé M. (2004). New Vector for Efficient Allelic Replacement in  
446 Naturally Nontransformable, Low-GC-Content, Gram-Positive Bacteria. *Appl Environ Microbiol*  
447 **70**: 6887–6891.
- 448 Chambers HF. (2001). The changing epidemiology of *Staphylococcus aureus*? *Emerg Infect Dis* **7**:  
449 178–182.
- 450 Chavez TT, Decker CF. (2008). Health Care-Associated MRSA Versus Community-Associated  
451 MRSA. *Dis Mon* **54**: 763–768.
- 452 David MZ, Daum RS. (2010). Community-Associated Methicillin-Resistant *Staphylococcus*  
453 *aureus*: Epidemiology and Clinical Consequences of an Emerging Epidemic. *Clin Microbiol Rev*  
454 **23**: 616–687.
- 455 Diep BA, Gill SR, Chang RF, Phan TH, Chen JH, Davidson MG, *et al.* (2006). Complete genome  
456 sequence of USA300, an epidemic clone of community-acquired methicillin-resistant  
457 *Staphylococcus aureus*. *The Lancet* **367**: 731–739.
- 458 Glaser P, Martins-Simões P, Villain A, Barbier M, Tristan A, Bouchier C, *et al.* (2016).  
459 Demography and Intercontinental Spread of the USA300 Community-Acquired Methicillin-  
460 Resistant *Staphylococcus aureus* Lineage. *mBio* **7**. e-pub ahead of print, doi:  
461 10.1128/mBio.02183-15.
- 462 Gothwal R, Shashidhar T. (2015). Antibiotic Pollution in the Environment: A Review. *CLEAN – Soil*  
463 *Air Water* **43**: 479–489.
- 464 Gullberg E, Albrecht LM, Karlsson C, Sandegren L, Andersson DI. (2014). Selection of a Multidrug  
465 Resistance Plasmid by Sublethal Levels of Antibiotics and Heavy Metals. *mBio* **5**: e01918-14.
- 466 Gullberg E, Cao S, Berg OG, Ilbäck C, Sandegren L, Hughes D, *et al.* (2011). Selection of Resistant  
467 Bacteria at Very Low Antibiotic Concentrations. *PLOS Pathog* **7**: e1002158.
- 468 Horsburgh MJ, Aish JL, White IJ, Shaw L, Lithgow JK, Foster SJ. (2002).  $\sigma$ B Modulates Virulence  
469 Determinant Expression and Stress Resistance: Characterization of a Functional *rsbU* Strain  
470 Derived from *Staphylococcus aureus* 8325-4. *J Bacteriol* **184**: 5457–5467.
- 471 Larsson DGJ. (2014). Antibiotics in the environment. *Ups J Med Sci* **119**: 108–112.

- 472 Li M, Cheung GYC, Hu J, Wang D, Joo H-S, DeLeo FR, *et al.* (2010). Comparative Analysis of  
473 Virulence and Toxin Expression of Global Community-Associated Methicillin-Resistant  
474 *Staphylococcus aureus* Strains. *J Infect Dis* **202**: 1866–1876.
- 475 Lowy FD. (1998). *Staphylococcus aureus* Infections. *N Engl J Med* **339**: 520–532.
- 476 Ma XX, Ito T, Tiensasitorn C, Jamklang M, Chongtrakool P, Boyle-Vavra S, *et al.* (2002). Novel  
477 Type of Staphylococcal Cassette Chromosome *mec* Identified in Community-Acquired  
478 Methicillin-Resistant *Staphylococcus aureus* Strains. *Antimicrob Agents Chemother* **46**: 1147–  
479 1152.
- 480 Martinez JL. (2009). The role of natural environments in the evolution of resistance traits in  
481 pathogenic bacteria. *Proc R Soc B Biol Sci* **276**: 2521–2530.
- 482 Mediavilla JR, Chen L, Mathema B, Kreiswirth BN. (2012). Global epidemiology of community-  
483 associated methicillin resistant *Staphylococcus aureus* (CA-MRSA). *Curr Opin Microbiol* **15**: 588–  
484 595.
- 485 Naimi TS, LeDell KH, Como-Sabetti K, Borchardt SM, Boxrud DJ, Etienne J, *et al.* (2003).  
486 Comparison of Community- and Health Care–Associated Methicillin-Resistant *Staphylococcus*  
487 *aureus* Infection. *JAMA* **290**: 2976–2984.
- 488 Okuma K, Iwakawa K, Turnidge JD, Grubb WB, Bell JM, O’Brien FG, *et al.* (2002). Dissemination  
489 of New Methicillin-Resistant *Staphylococcus aureus* Clones in the Community. *J Clin Microbiol*  
490 **40**: 4289–4294.
- 491 O’Neill A j. (2010). *Staphylococcus aureus* SH1000 and 8325-4: comparative genome sequences  
492 of key laboratory strains in staphylococcal research. *Lett Appl Microbiol* **51**: 358–361.
- 493 Pi B, Yu M, Chen Y, Yu Y, Li L. (2009). Distribution of the ACME-*arcA* gene among methicillin-  
494 resistant *Staphylococcus haemolyticus* and identification of a novel *ccr* allotype in ACME-*arcA*-  
495 positive isolates. *J Med Microbiol* **58**: 731–736.
- 496 Planet PJ. (2017). Life After USA300: The Rise and Fall of a Superbug. *J Infect Dis* **215**: S71–S77.
- 497 Planet PJ, Diaz L, Kolokotronis S-O, Narechania A, Reyes J, Xing G, *et al.* (2015). Parallel  
498 Epidemics of Community-Associated Methicillin-Resistant *Staphylococcus aureus* USA300  
499 Infection in North and South America. *J Infect Dis* **212**: 1874–1882.
- 500 Regev-Yochay G, Trzciński K, Thompson CM, Malley R, Lipsitch M. (2006). Interference between  
501 *Streptococcus pneumoniae* and *Staphylococcus aureus*: In Vitro Hydrogen Peroxide-Mediated  
502 Killing by *Streptococcus pneumoniae*. *J Bacteriol* **188**: 4996–5001.

- 503 Reynolds J, Wigneshweraraj S. (2011). Molecular insights into the control of transcription  
504 initiation at the *Staphylococcus aureus* agr operon. *J Mol Biol* **412**: 862–881.
- 505 Rosenstein R, Nerz C, Biswas L, Resch A, Raddatz G, Schuster SC, *et al.* (2009). Genome Analysis  
506 of the Meat Starter Culture Bacterium *Staphylococcus carnosus* TM300. *Appl Environ Microbiol*  
507 **75**: 811–822.
- 508 See I, Wesson P, Gualandi N, Dumyati G, Harrison LH, Leshner L, *et al.* (2017). Socioeconomic  
509 Factors Explain Racial Disparities in Invasive Community-Associated Methicillin-Resistant  
510 *Staphylococcus aureus* Disease Rates. *Clin Infect Dis* **64**: 597–604.
- 511 Stegger M, Wirth T, Andersen PS, Skov RL, De Grassi A, Simões PM, *et al.* (2014). Origin and  
512 Evolution of European Community-Acquired Methicillin-Resistant *Staphylococcus aureus*. *mBio*  
513 **5**. e-pub ahead of print, doi: 10.1128/mBio.01044-14.
- 514 Thurlow LR, Joshi GS, Clark J R, Spontak JS, Neely CJ, Maile R, *et al.* (2013). Functional  
515 Modularity of the Arginine Catabolic Mobile Element Contributes to the Success of USA300  
516 Methicillin-Resistant *Staphylococcus aureus*. *Cell Host Microbe* **13**: 100–107.
- 517 Thurlow LR, Joshi GS, Richardson AR. (2012). Virulence Strategies of the Dominant USA300  
518 Lineage of Community Associated Methicillin Resistant *Staphylococcus aureus* (CA-MRSA). *FEMS*  
519 *Immunol Med Microbiol* **65**: 5–22.
- 520 Tristan A, Bes M, Meugnier H, Lina G, Bozdogan B, Courvalin P, *et al.* (2007). Global Distribution  
521 of Pantone-Valentine Leukocidin-positive Methicillin-resistant *Staphylococcus aureus*, 2006.  
522 *Emerg Infect Dis* **13**: 594–600.
- 523 Uhlemann A-C, Dordel J, Knox JR, Raven KE, Parkhill J, Holden MTG, *et al.* (2014). Molecular  
524 tracing of the emergence, diversification, and transmission of *S. aureus* sequence type 8 in a  
525 New York community. *Proc Natl Acad Sci U S A* **111**: 6738–6743.
- 526 Van Doorslaer X, Dewulf J, Van Langenhove H, Demeestere K. (2014). Fluoroquinolone  
527 antibiotics: An emerging class of environmental micropollutants. *Sci Total Environ* **500–501**:  
528 250–269.
- 529 Vandenesch F, Naimi T, Enright MC, Lina G, Nimmo GR, Heffernan H, *et al.* (2003). Community-  
530 Acquired Methicillin-Resistant *Staphylococcus aureus* Carrying Pantone-Valentine Leukocidin  
531 Genes: Worldwide Emergence. *Emerg Infect Dis* **9**: 978–984.
- 532 Westhoff S, van Leeuwe TM, Qachach O, Zhang Z, van Wezel GP, Rozen DE. (2017). The  
533 evolution of no-cost resistance at sub-MIC concentrations of streptomycin in *Streptomyces*  
534 *coelicolor*. *ISME J* **11**: 1168–1178.

535 Zhang Y-Q, Ren S-X, Li H-L, Wang Y-X, Fu G, Yang J, *et al.* (2003). Genome-based analysis of  
536 virulence genes in a non-biofilm-forming *Staphylococcus epidermidis* strain (ATCC 12228). *Mol*  
537 *Microbiol* **49**: 1577–1593.

538

## 539 **FIGURE LEGEND**

### 540 **Figure 1: Bayesian demography of USA300 and EU-ST80 lineages.**

541 Bayesian skyline plot indicating population size changes in the USA300 (a) and EU-ST80 (b) lineages over time with  
542 a relaxed molecular clock. The shaded area represents the 95% confidence interval. Strain selection and their  
543 designation are indicated by colored thumbnails. Adapted from Glaser *et al.* (2016) and Stegger *et al.* 2014.

544

### 545 **Figure 2: Doubling times of USA300 and EU-ST80 strains.**

546 USA300 (a) or EU-ST80 (b) isolates were cultured in BHI incubated on 96-wells plates for 24 hours at 37°C with  
547 continuous optical density monitoring at 600nm (Tecan Infinite® 200 PRO). Doubling times were calculated by  
548 graphical method after Log transformation of data from the exponential growth phase. The color codes for each  
549 strain correspond to those in Fig. 1. (\*:  $P = 0.029$ ). Experiments were performed on three independent series  
550 (biological replicates), and optical densities were measured on three wells for each strain (technical replicates).

551

### 552 **Figure 3: Expression of virulence related genes among USA300 and EU-ST80 strains.**

553 Expression of virulence factor- and regulatory-genes were assessed by qRT-PCR among USA300 isolates (a) and EU-  
554 ST80 isolates (b) of various temporal phases of the demographic expansion. Results are expressed as fold change in  
555 comparison to the most ancestral strain of the lineage (plain) or to the reference strain of the lineage (striped).  
556 Experiments were performed on three independent series (biological replicates), and three RNA quantifications  
557 were done for each RNA sample (technical replicates).

558

### 559 **Figure 4: Biofilm production assay for EU-ST80 strains.**

560 (a) Biofilm production was assessed by crystal violet stain on strains of the EU-ST80 lineage belonging to ancestral  
561 clade (Basal MSSA 3 and 4) or derived clade (Derived MRSA 3 and 5), the latter carrying the *mecA* gene and  
562 expressing an AgrC L184I variant. *S. aureus* SH1000 was used as positive control for biofilm production and *S.*

563 *carneus* TM300 and *S. epidermidis* ATCC12228 were negative controls. **(b)** Comparison in biofilm production by  
564 crystal violet from EU-ST80 Basal MSSA 3 and its isogenic derivative expressing an AgrC L184I variant (Lab Mutated  
565 Basal MSSA). The color codes for each strain correspond to those in Fig. 1. (\*:  $P = 0.015$ ; \*\*:  $P = 0.002$ ). Experiments  
566 were performed on three independent series (biological replicates), and biofilm production was quantified on three  
567 wells for each strain (technical replicates).

568

#### 569 **Figure 5: Impact of ACME in competitive fitness of USA300.**

570 **(a)** ACME-negative and -positive strains, both MRSA with no associated antibiotics resistance were co-cultivated for  
571 21 days in BHI with daily subculture in fresh medium. The proportion of each strain was monitored at day 1, 7, 14  
572 and 21 with qPCR targeting *arcA*-ACME. **(b)** ACME-positive strains, one Fluoroquinolone (FQ)-susceptible (Derived  
573 USA300 3) and one FQ-resistant (Derived USA300 5) were co-cultivated for 21 days in BHI with daily subculture in  
574 fresh medium. The proportion of each strain was monitored daily with differential colony count based on selective  
575 agar inoculated with a calibrated amount of competitive mix. Same results were obtained with a competition  
576 between the FQ-resistant strain (Derived USA300 5) and another FQ-susceptible isolate (Derived USA300 4), data  
577 not shown. **(c)** ACME-positive FQ-resistant strain (Derived USA300 5) and ACME-negative strain FQ-susceptible  
578 (Basal USA300 1) were co-cultivated for 21 days and assessed as in **(b)**. Competitive cultures were performed on  
579 three independent series (biological replicates), and each colony count or qPCR was repeated three times  
580 (technical replicates).

581

#### 582 **Figure 6: Potential impact of FQ resistance in competitive fitness of USA300.**

583 **(a)** Fluoroquinolone (FQ)-susceptible and -resistant strains of USA300, both ACME-positive, were co-cultivated for  
584 21 days in BHI without antibiotics, or **(b)** containing ofloxacin at  $1/16$  of FQ MIC of the susceptible strain (0.024  
585  $\mu\text{g}/\text{mL}$ ), **(c)**  $1/32$  MIC (0.012  $\mu\text{g}/\text{mL}$ ) or **(d)**  $1/100$  MIC (0.003  $\mu\text{g}/\text{mL}$ ) with daily subculture in fresh medium. The  
586 proportion of each strain was monitored daily with differential colony count based on selective agar inoculated  
587 with a calibrated amount of competitive mix. Competitive cultures were performed on three independent series  
588 (biological replicates), and each colony count or qPCR was repeated three times (technical replicates).

589

#### 590 **Figure 7: Potential impact of *mecA/fusB* acquisition and *agrC* mutation on competitive fitness** 591 **of EU-ST80.**

592 **(a)** The *mecA/fusB*-negative (Basal MSSA 3) AgrC L184I was co-cultivated with its *agrC* derivative (Lab Mutated Basal  
593 MSSA) carrying the AgrC L184I mutation. **(b)** A *mecA/fusB*-negative (Basal MSSA 3) AgrC wild type (L184) strain and

594 a *mecA/fusB*-positive (Derived MRSA 5) AgrC L84I strain were then co-cultivated for 21 days in BHI without  
595 antibiotics; same results were obtained with Basal MSSA 4 versus Derived MRSA 3 (data not shown). **(c) & (d)** The  
596 Basal MSSA 3 strain was co-cultivated with the Derived MRSA 5 strain for 21 days in BHI containing ceftriaxone or  
597 fusidic acid at  $1/100$  of MIC for the MSSA/*fusB*<sup>neg</sup> strain (0.03 µg/mL or 0.0009 µg/mL respectively) with daily  
598 subculture in fresh medium. The proportion of each strain was monitored daily with differential colony count based  
599 on selective agar inoculated with a calibrated amount of competitive mix for **(b), (c), (d)** or by quantitative PCR due  
600 to the lack of discriminant antibiotic resistance marker for **(a)**. The same results were obtained with antibiotics  
601 concentrations of  $1/16$  and  $1/32$  of their MICs and with the couple Basal MSSA 4 versus Derived MRSA 3 (data not  
602 shown). Competitive cultures were performed on three independent series (biological replicates), and each colony  
603 count or qPCR was repeated three times (technical replicates).

604

### 605 **Table 1: Relevant characteristics of strains**

606 Strains list with their ID's (as used in the manuscript and figures), NRCS Number (as used in reference publications),  
607 relevant characteristics, and reference publications.

608

### 609 **Table S1: Strains pairs used for competitive fitness study**

610 Strains pairs listed according to their lineage assignment, with discriminant parameters ("Striking difference").

611

### 612 **Table S2: Primers used for qPCR and RT-qPCR**

613 Primers list including target genes used for resistance-based strain discrimination (*mecA*, *tetK*, *grlA*), phylogenic  
614 clade discrimination (*agrC*, *arcA*-ACME), virulence factor expression assay (*RNAIII*, *hla*, *hlgC*, *lukS-PV*, *PSM $\alpha$* ),  
615 engineering of the Lab Mutated basal MSSA (*agrC*2912, 555, 4238, 544), and standardization (*gyr*).



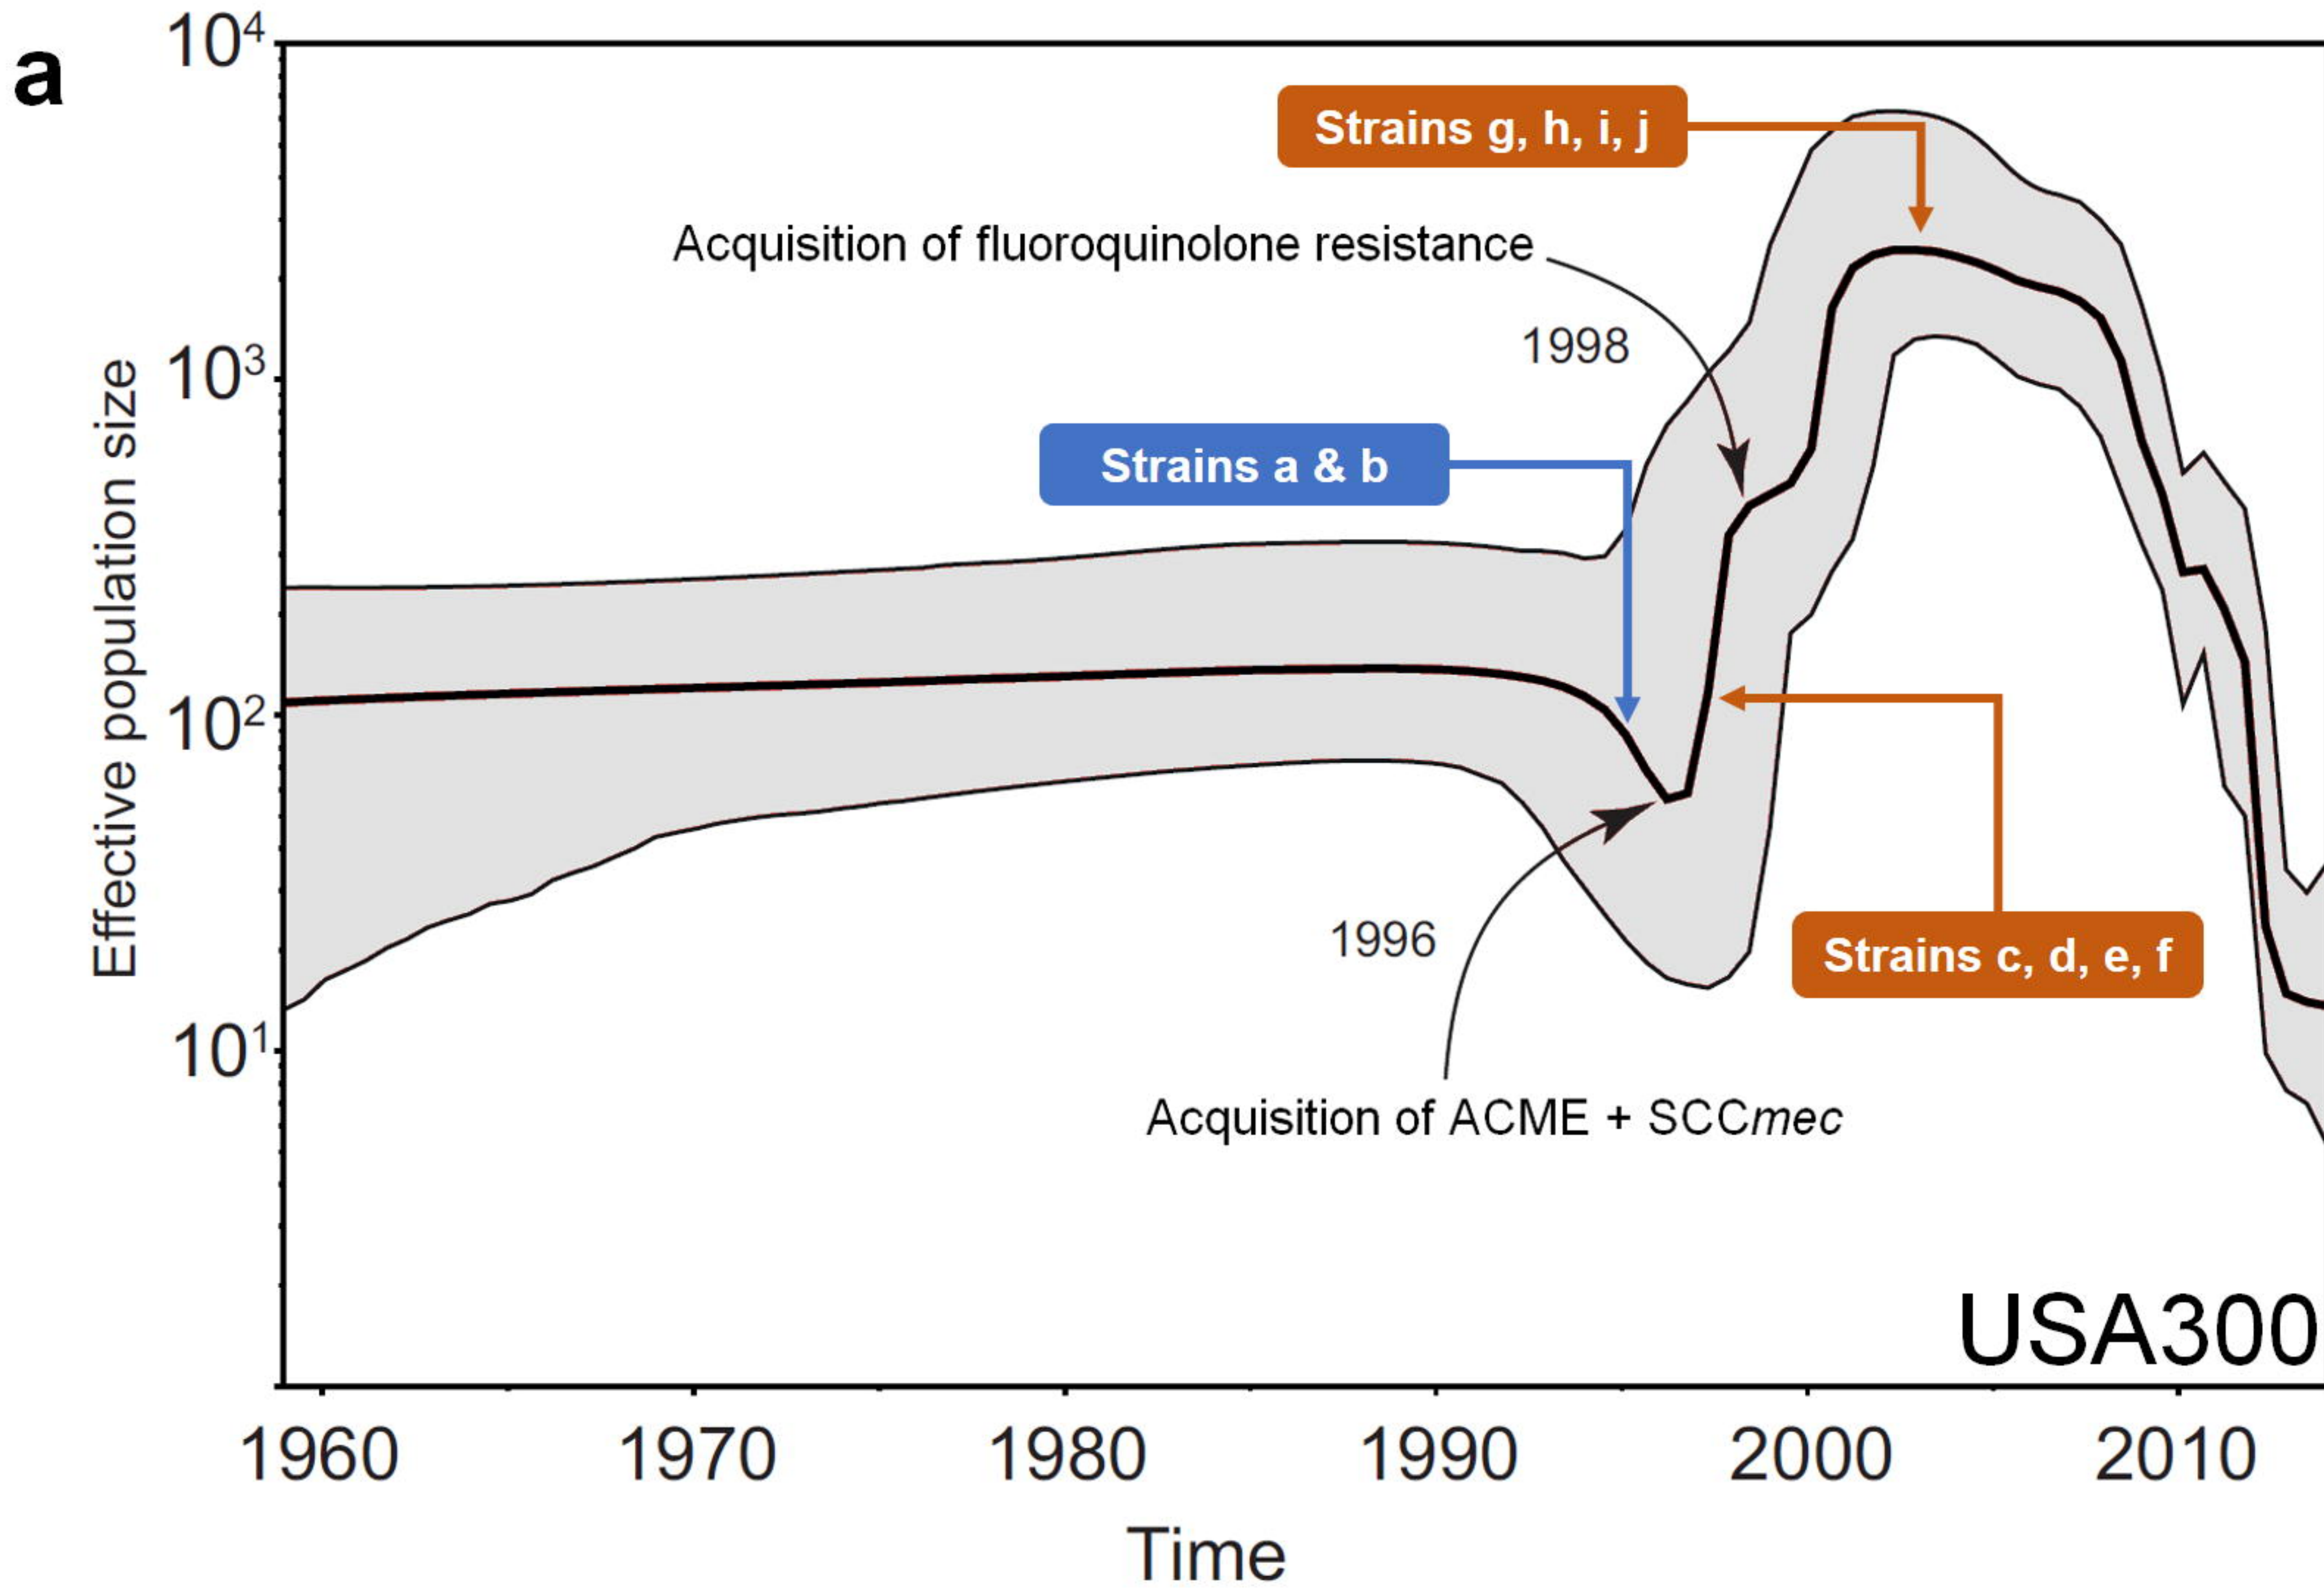

Basal USA300-NA  
ACME<sup>neg</sup>, FQ (S)

a: Basal USA300 1  
b: Basal USA300 2

Derived USA300-NA  
ACME<sup>+</sup>, FQ (S)

c: Derived USA300 1  
d: Derived USA300 2  
e: Derived USA300 3  
f: Derived USA300 4

Derived USA300-NA  
ACME<sup>+</sup>, FQ (R)

g: Derived USA300 5  
h: Derived USA300 6  
i: Derived USA300 7  
j: Derived USA300 8

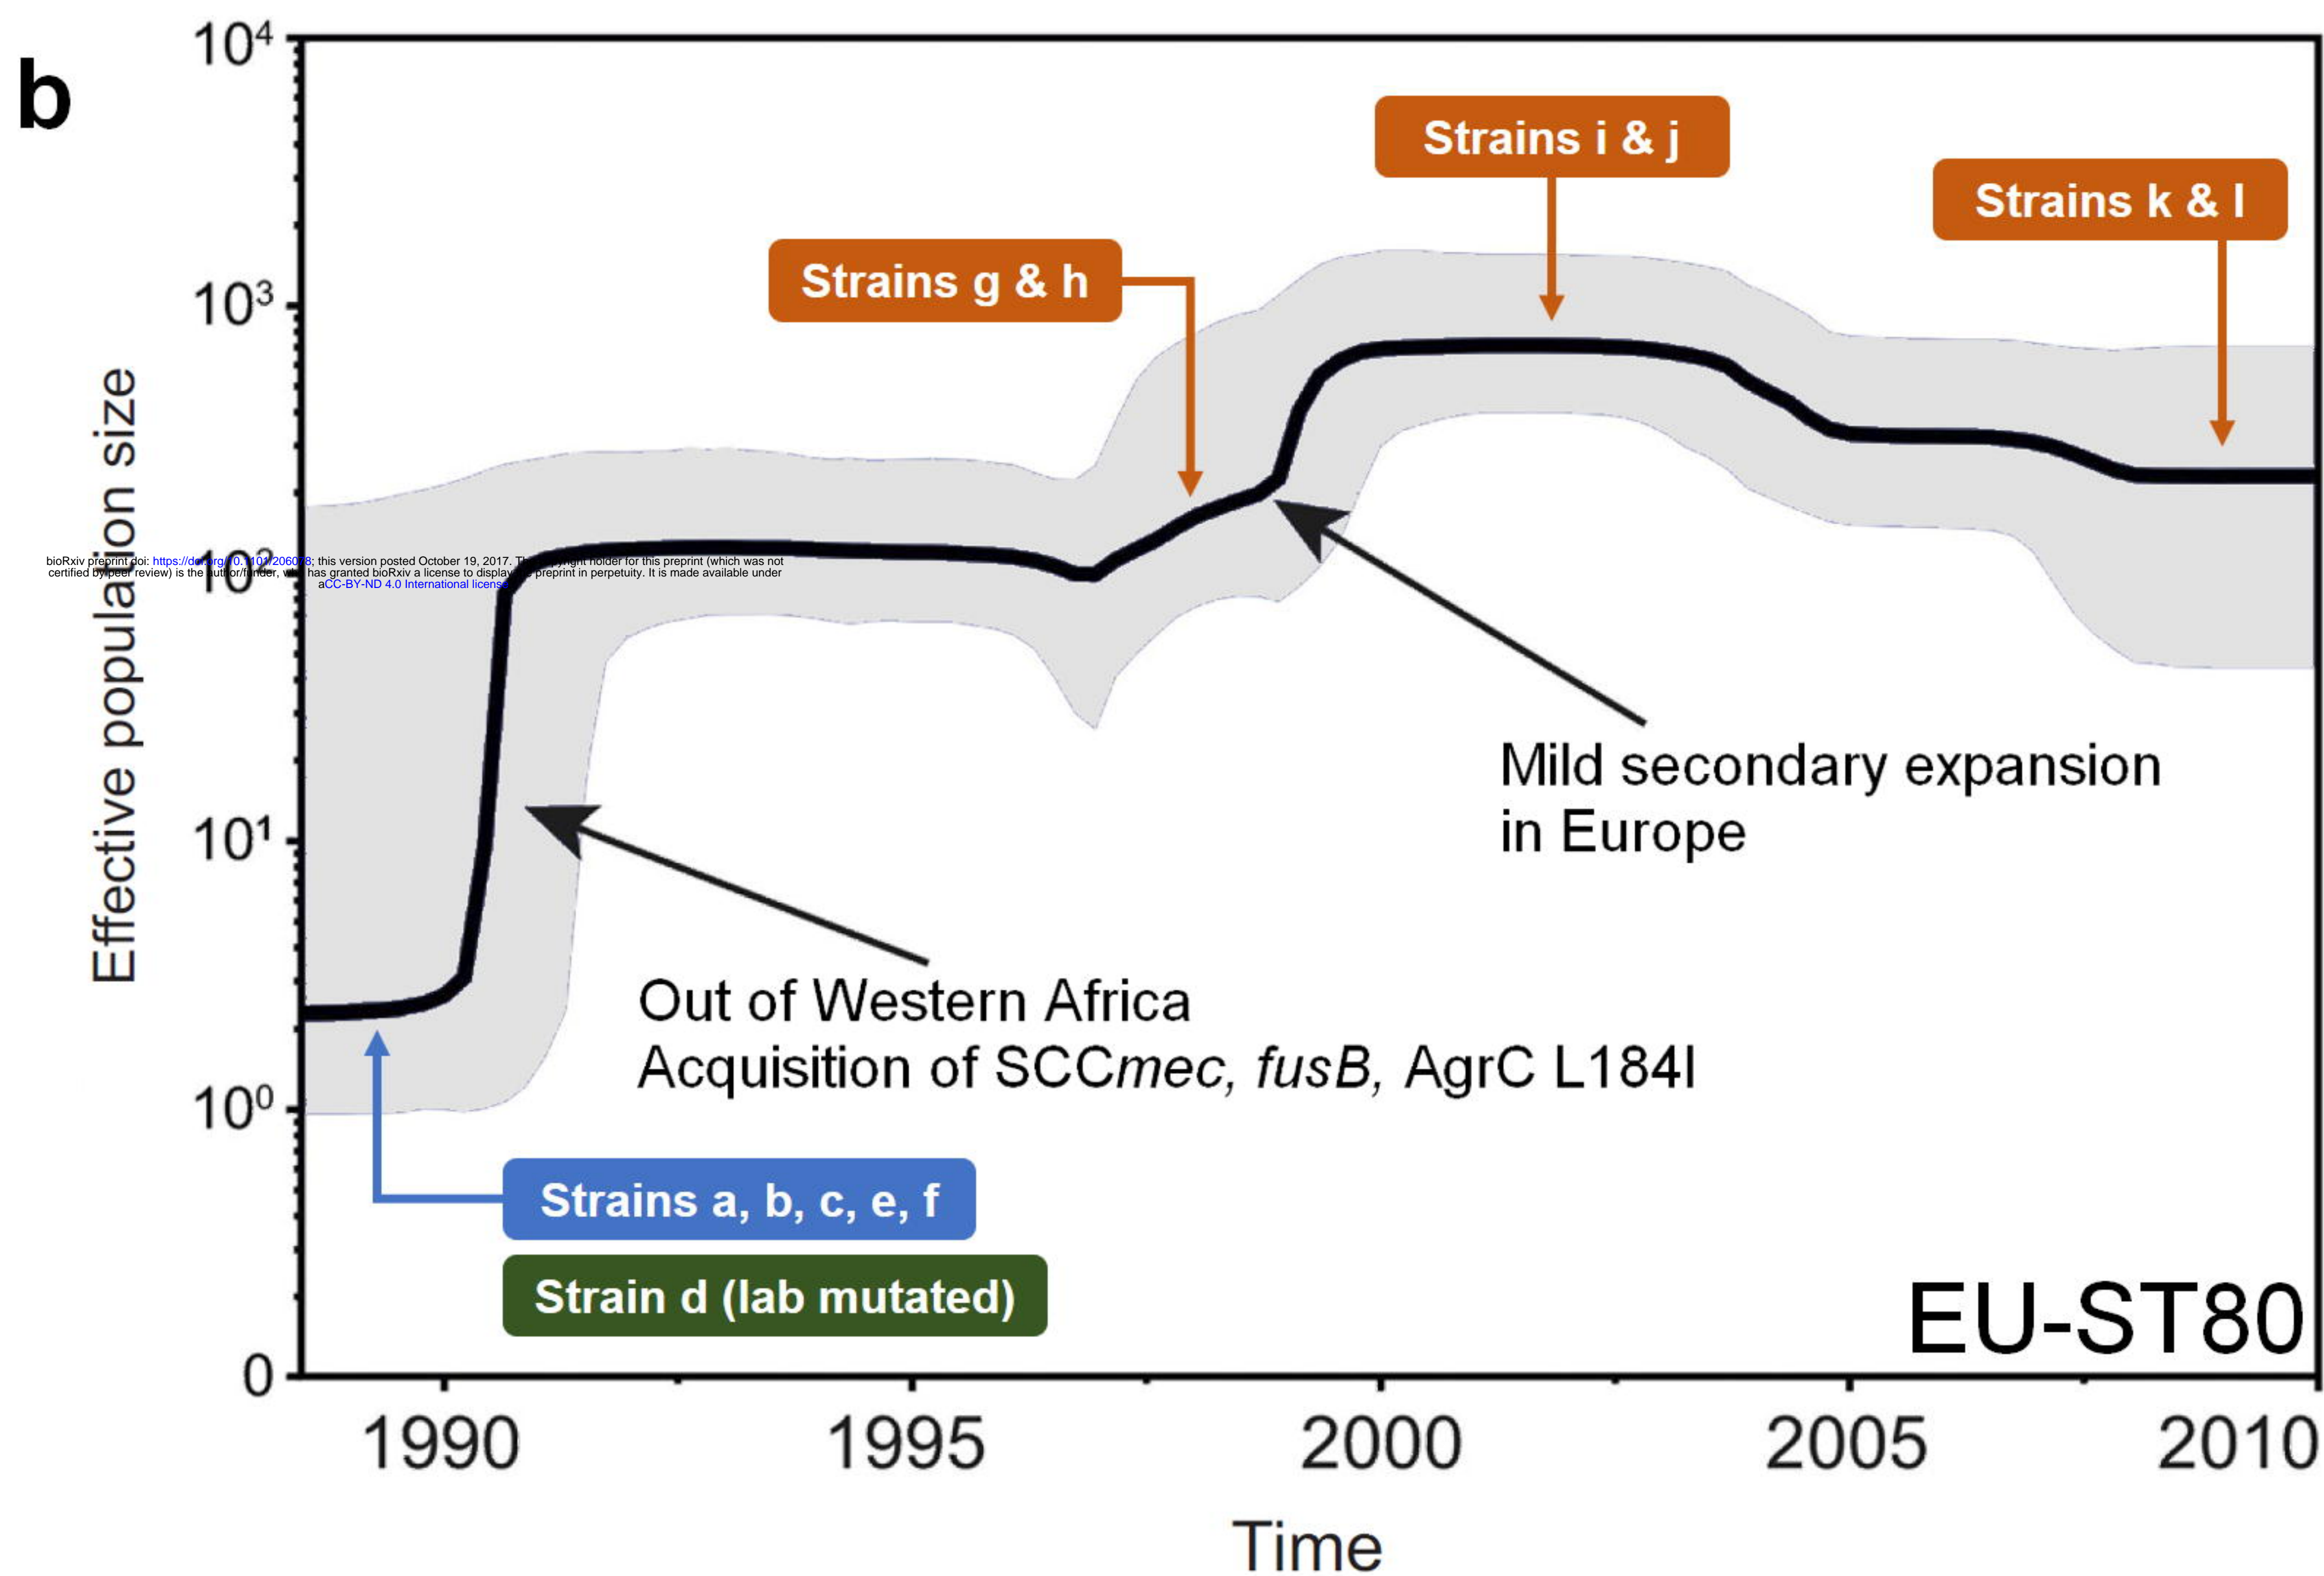

Basal MSSA

a: Basal MSSA 1  
b: Basal MSSA 2  
c: Basal MSSA 3  
e: Basal MSSA 4  
f: Basal MSSA 5

Lab mutated  
Basal MSSA

d: Lab mutated (AgrC L184I)  
Basal MSSA

Derived MRSA  
(Maghreb)

g: Derived MRSA 1  
h: Derived MRSA 2

Derived MRSA  
(Europe)

i: Derived MRSA 3  
j: Derived MRSA 4  
k: Derived MRSA 5  
l: Derived MRSA 6



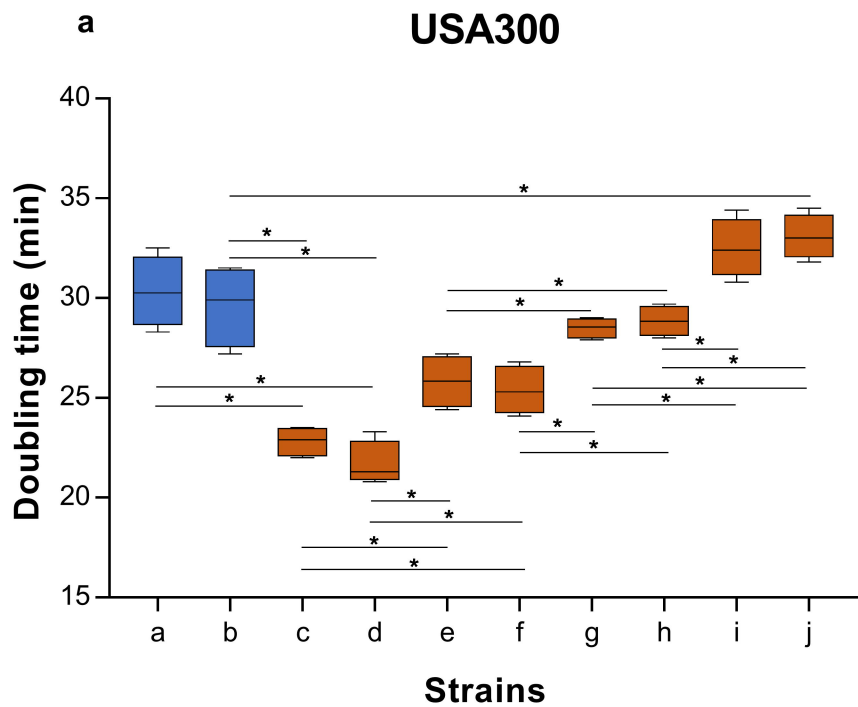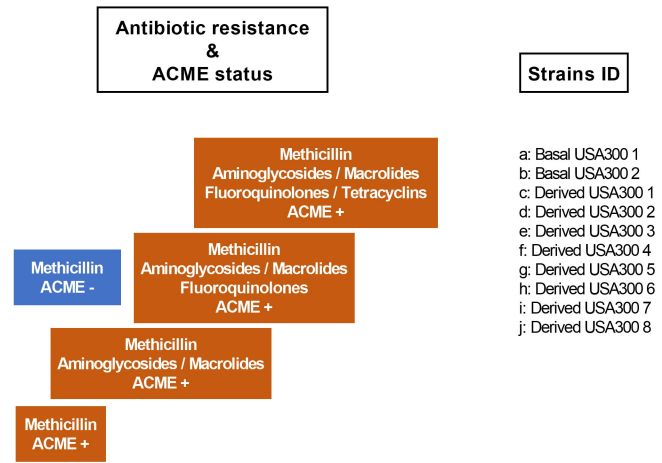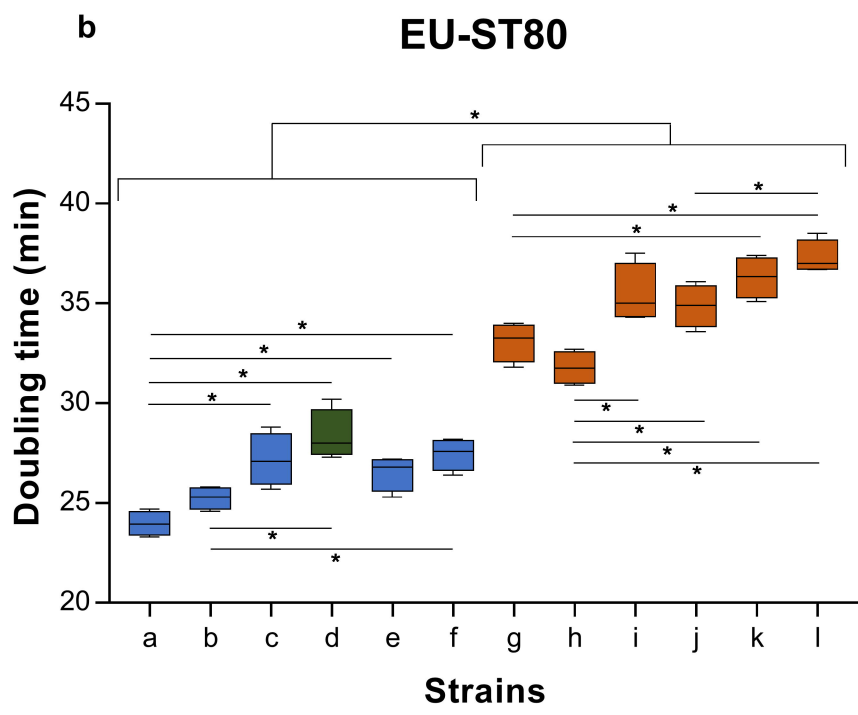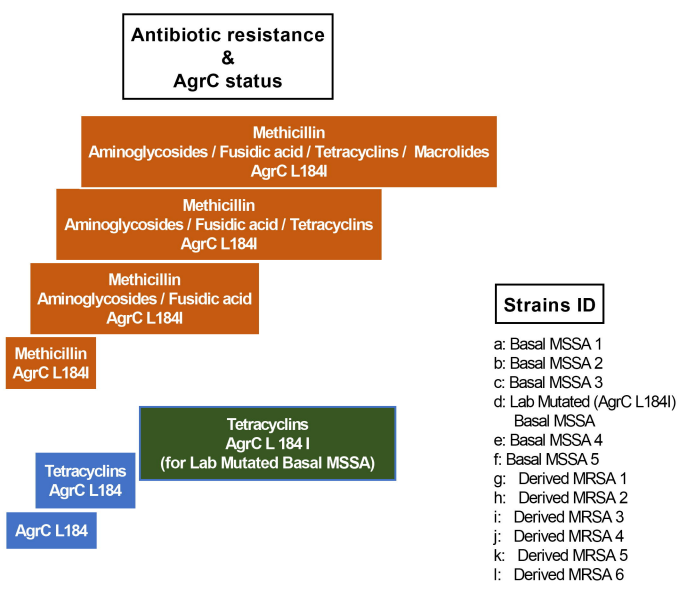

**a**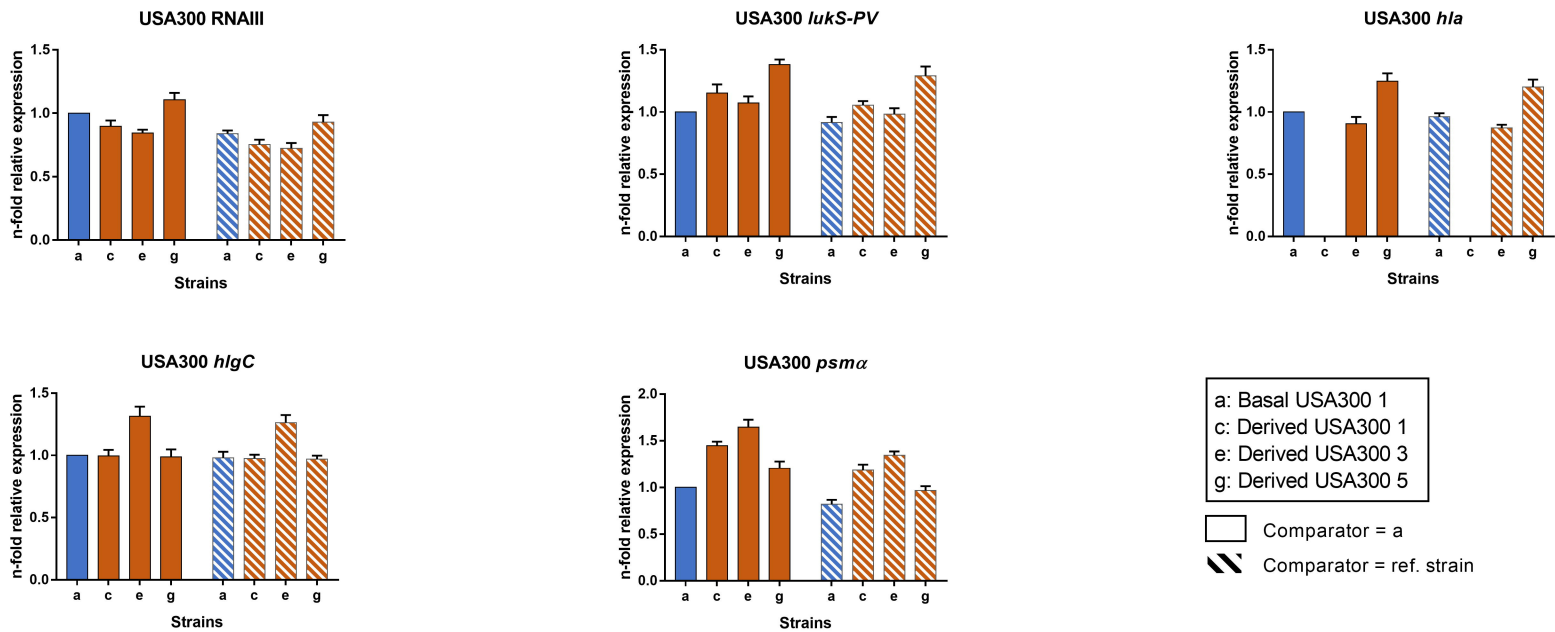**b**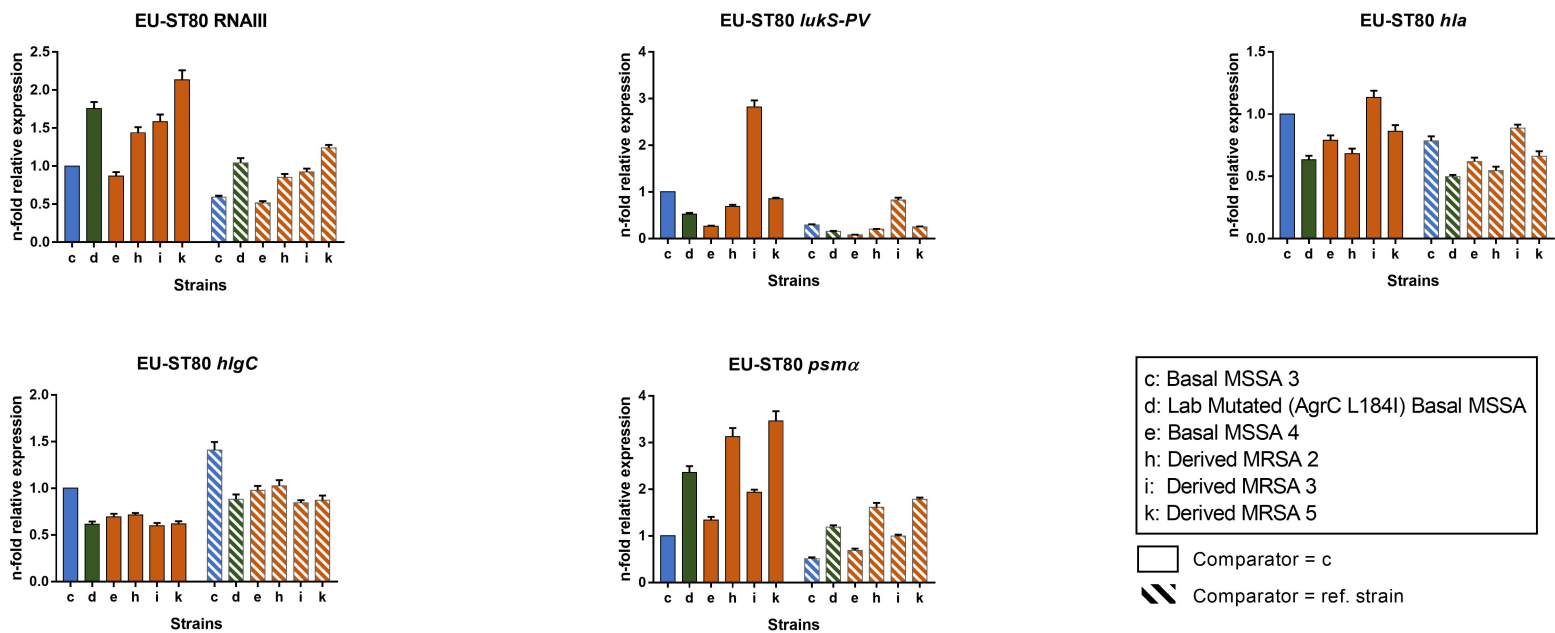

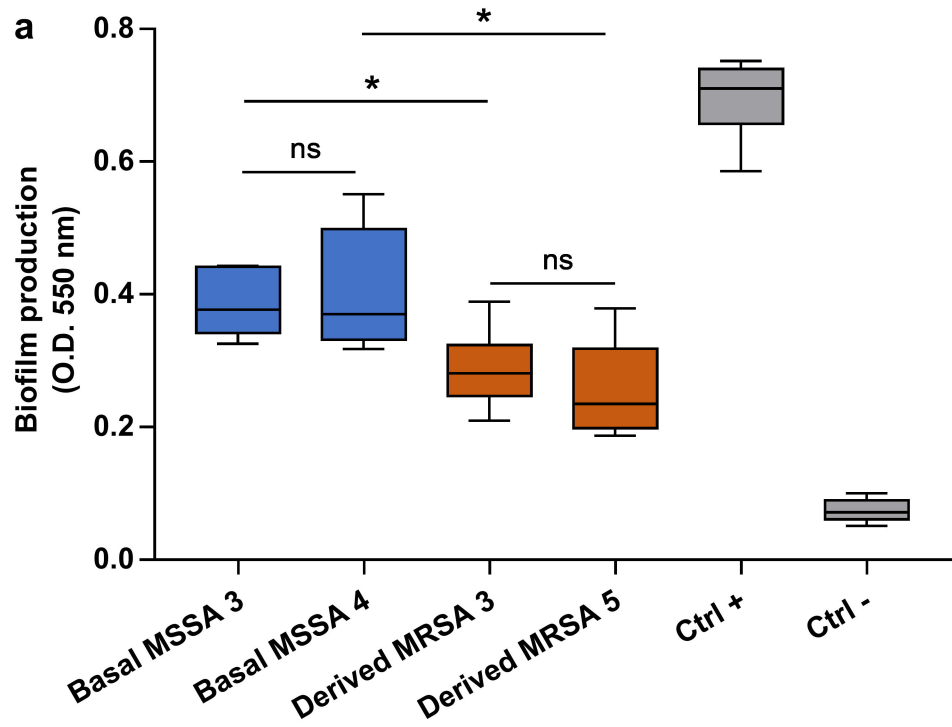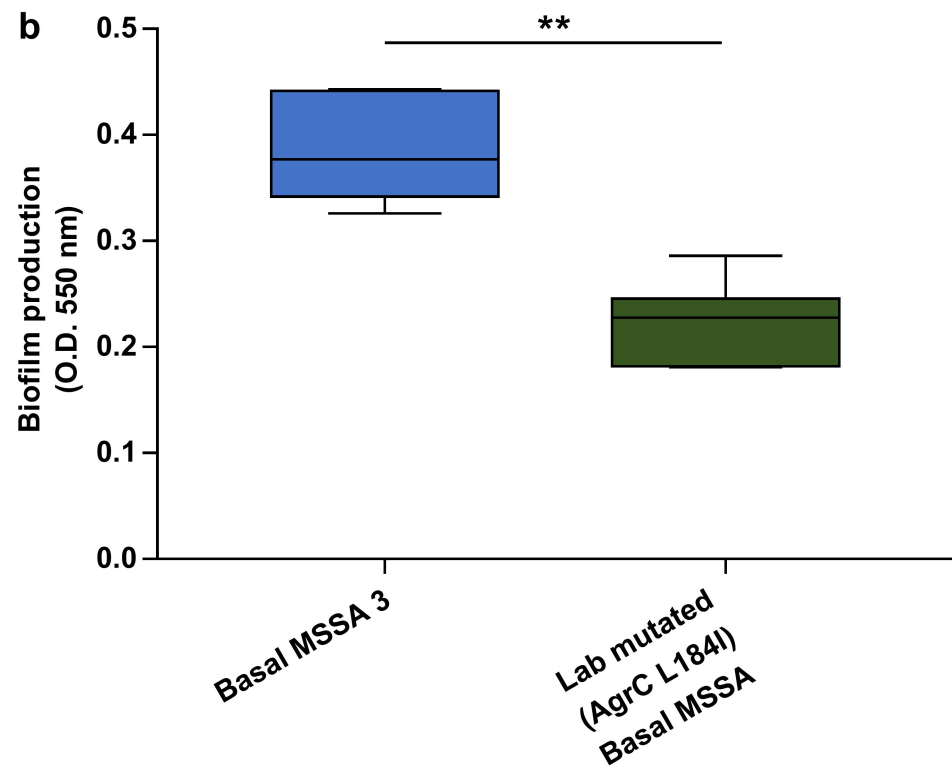

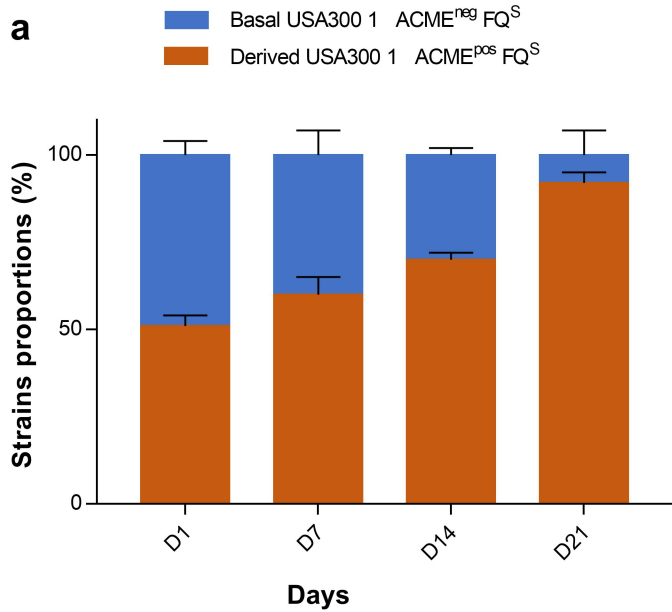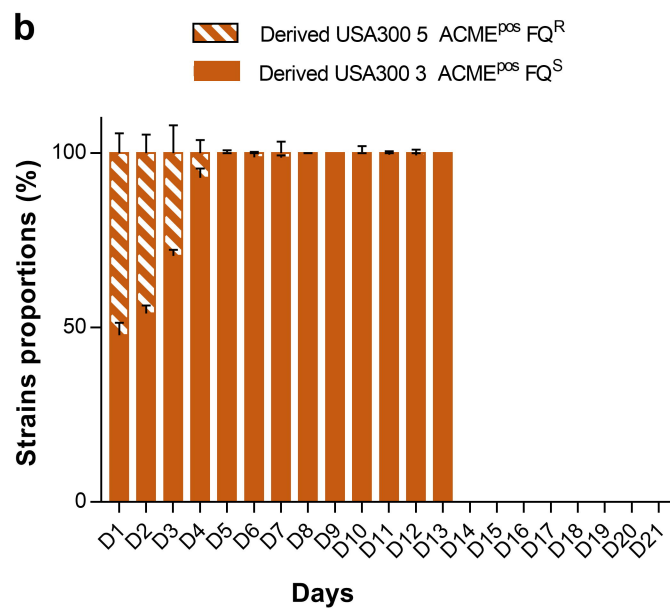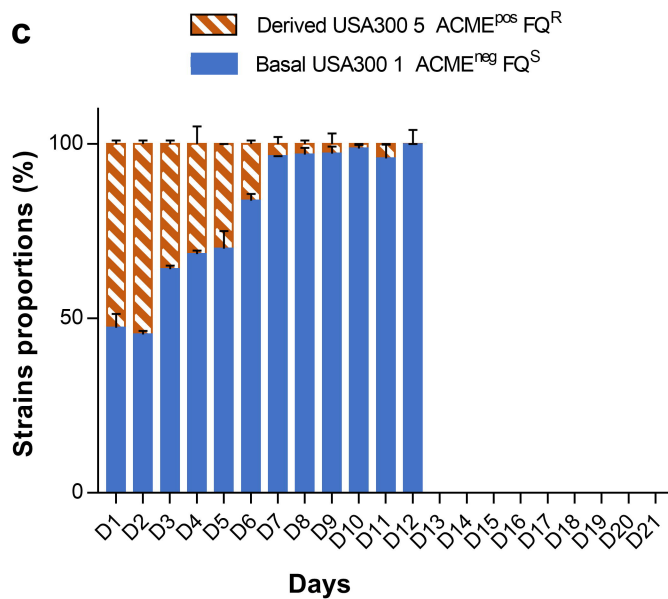

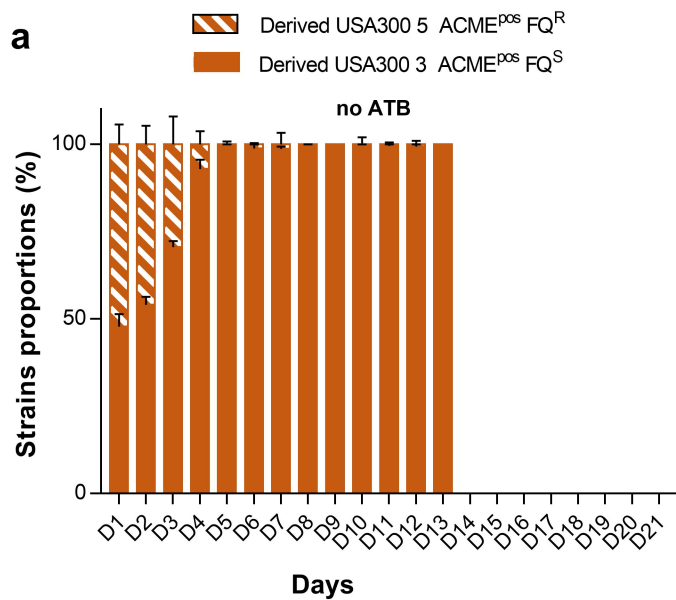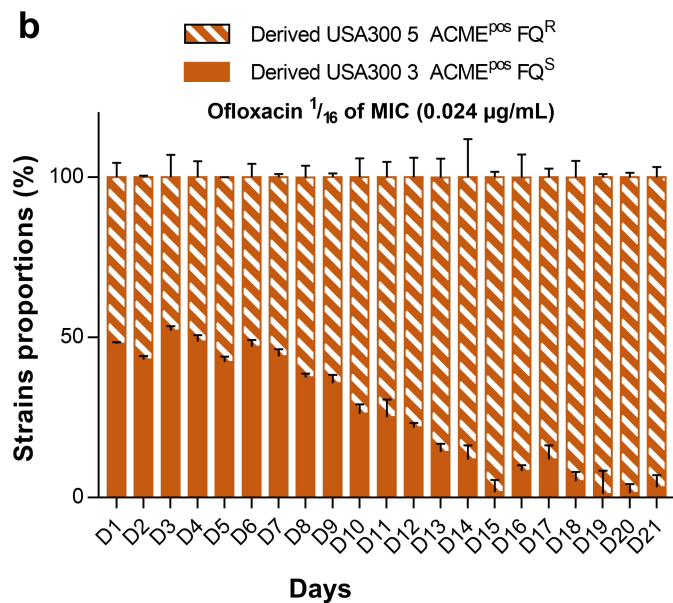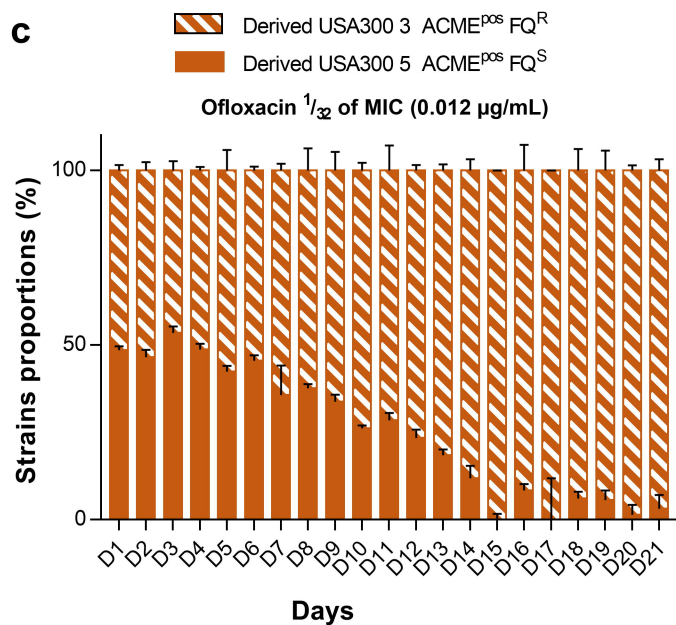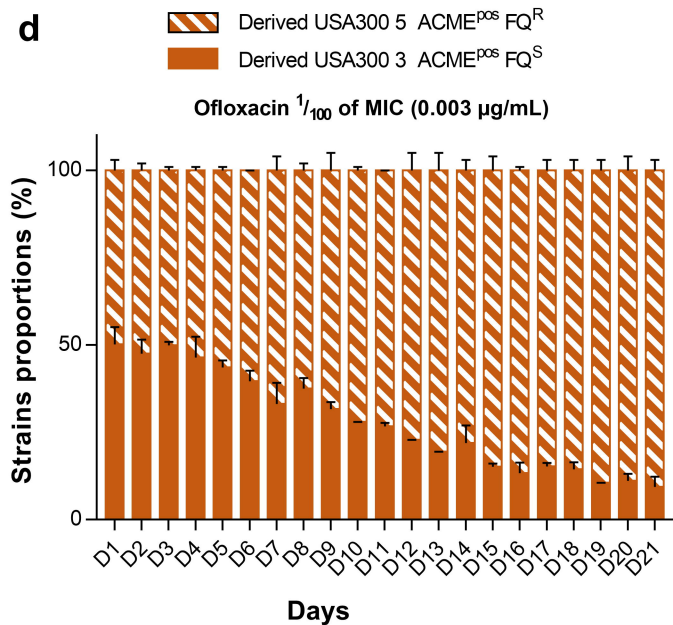

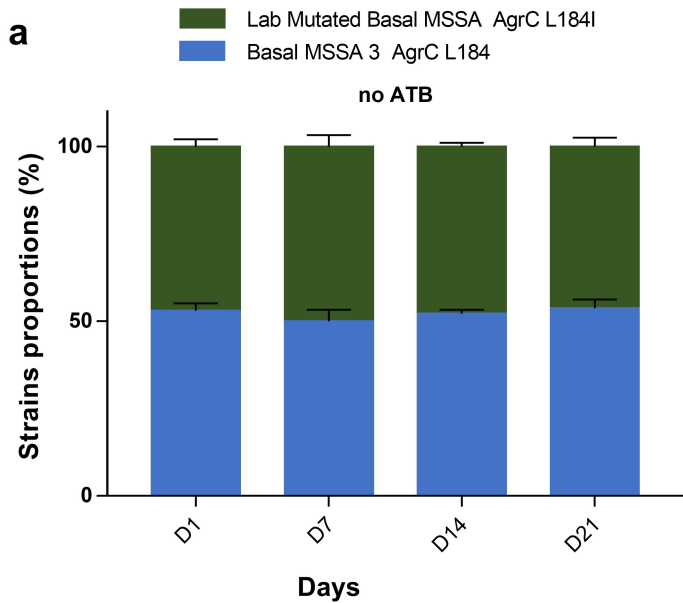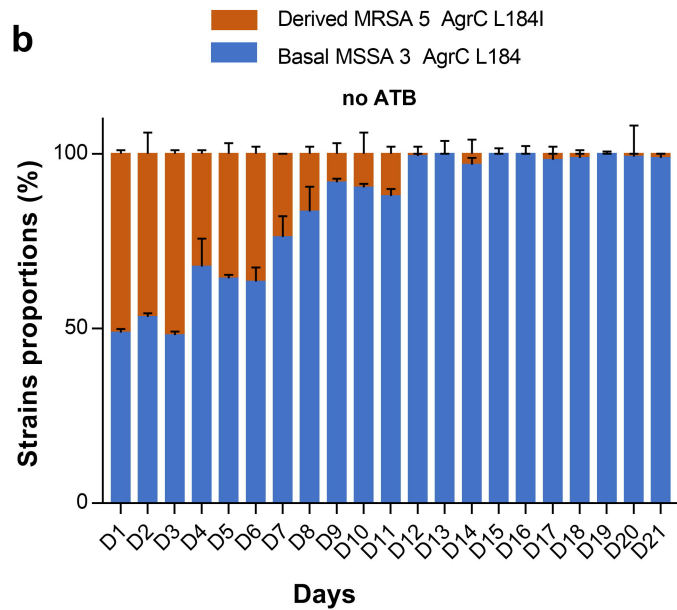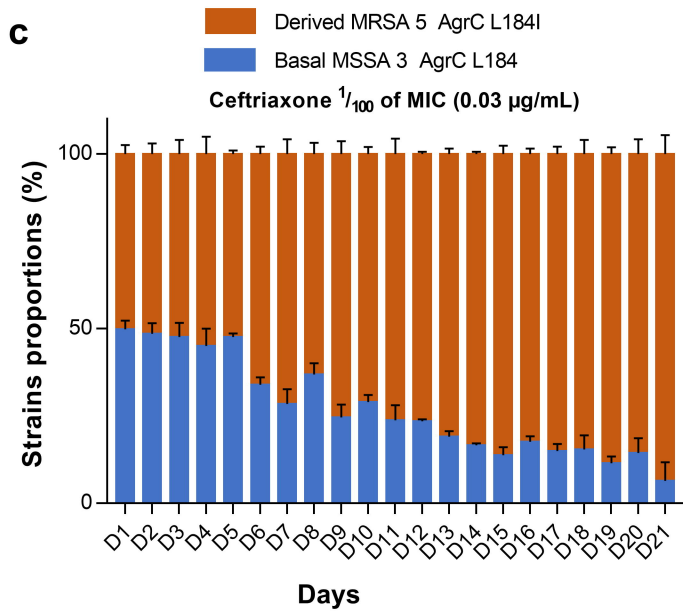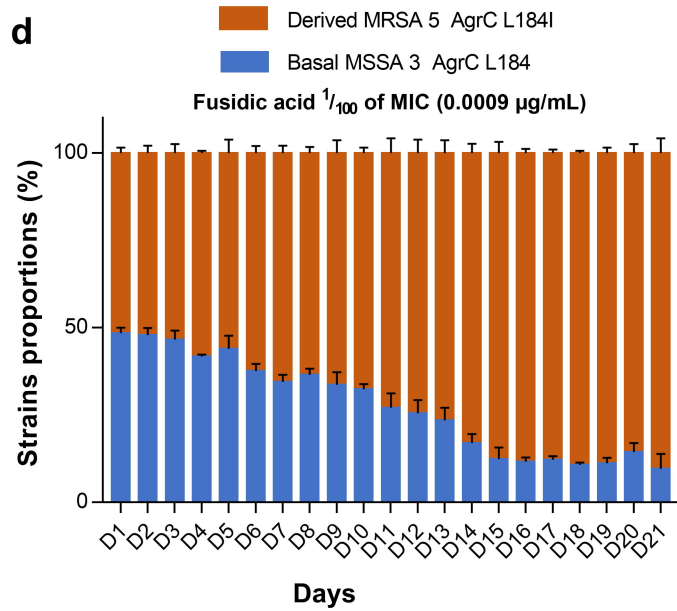

1 **Table 1:** Relevant characteristics of strains

| STRAIN DESIGNATION            | NRCS number        | RELEVANT CHARACTERISTICS                              | REFERENCES                   |
|-------------------------------|--------------------|-------------------------------------------------------|------------------------------|
| <b><u>USA300 strains</u></b>  |                    |                                                       |                              |
| USA300 ref strain             | SF8300-LUG2295     | <i>mecA</i> , ACME, [R = Oxa, E, C, T, Cip, Mup]      | Diep <i>et al.</i> , 2008    |
| Basal USA300 1                | ST2003-0343        | <i>mecA</i> , [R = Oxa]                               | This study                   |
| Basal USA300 2                | ST2005-0026        | <i>mecA</i> , [R = Oxa]                               | This study                   |
| Derived USA300 1              | ST2012-0558        | <i>mecA</i> , ACME, [R = Oxa]                         | Glaser <i>et al.</i> , 2016  |
| Derived USA300 2              | ST2012-1514        | <i>mecA</i> , ACME, [R = Oxa]                         | Glaser <i>et al.</i> , 2016  |
| Derived USA300 3              | ST2013-0343        | <i>mecA</i> , ACME, [R = Oxa,K,E]                     | Glaser <i>et al.</i> , 2016  |
| Derived USA300 4              | ST2011-2484        | <i>mecA</i> , ACME, [R = Oxa,K,E]                     | Glaser <i>et al.</i> , 2016  |
| Derived USA300 5              | ST2011-1414        | <i>mecA</i> , ACME, [R = Oxa,K,E,O]                   | Glaser <i>et al.</i> , 2016  |
| Derived USA300 6              | ST2013-0068        | <i>mecA</i> , ACME, [R = Oxa,K,E,O]                   | Glaser <i>et al.</i> , 2016  |
| Derived USA300 7              | ST2013-1284        | <i>mecA</i> , ACME, [R = Oxa,K,E,O, T]                | Glaser <i>et al.</i> , 2016  |
| Derived USA300 8              | ST2013-1763        | <i>mecA</i> , ACME, [R = Oxa,K,E,O, T]                | Glaser <i>et al.</i> , 2016  |
| <b><u>EU-ST80 strains</u></b> |                    |                                                       |                              |
| EU-ST80 ref strain            | HT20020209-LUG1799 | <i>mecA</i> , AgrC L184, [R = Oxa, K, T, F]           | Perret <i>et al.</i> , 2012  |
| Basal MSSA 1                  | HT2002-0042        | AgrC L184                                             | Stegger <i>et al.</i> , 2014 |
| Basal MSSA 2                  | HT2006-0859        | AgrC L184                                             | Stegger <i>et al.</i> , 2014 |
| Basal MSSA 3                  | HT2003-0006        | AgrC L184, [R = T]                                    | Stegger <i>et al.</i> , 2014 |
| Lab Mutated Basal MSSA        | LUG2417            | <b>AgrC L184I</b> , [R = T]                           | This study                   |
| Basal MSSA 4                  | HT2004-1302        | AgrC L184, [R = T]                                    | Stegger <i>et al.</i> , 2014 |
| Basal MSSA 5                  | HT2005-0374        | AgrC L184, [R = T]                                    | Stegger <i>et al.</i> , 2014 |
| Derived MRSA 1                | ST2007-1277        | <i>mecA</i> , <b>AgrC L184I</b> , [R = Oxa]           | Stegger <i>et al.</i> , 2014 |
| Derived MRSA 2                | ST2007-1273        | <i>mecA</i> , <b>AgrC L184I</b> , [R = Oxa]           | Stegger <i>et al.</i> , 2014 |
| Derived MRSA 3                | ST2005-0508        | <i>mecA</i> , <b>AgrC L184I</b> , [R = Oxa,K,F]       | Stegger <i>et al.</i> , 2014 |
| Derived MRSA 4                | ST2009-0942        | <i>mecA</i> , <b>AgrC L184I</b> , [R = Oxa,K,F,T]     | Stegger <i>et al.</i> , 2014 |
| Derived MRSA 5                | ST2007-0258        | <i>mecA</i> , <b>AgrC L184I</b> , [R = Oxa,K,F,T,E,C] | Stegger <i>et al.</i> , 2014 |
| Derived MRSA 6                | ST2007-1047        | <i>mecA</i> , <b>AgrC L184I</b> , [R = Oxa,K,F,T,E,C] | Stegger <i>et al.</i> , 2014 |

2  
3 C: Clindamycin - Cip: Ciprofloxacin - E: Erythromycin - K: Kanamycin - NRCS: National Reference Center for  
4 Staphylococci - O: Ofloxacin - Oxa: Oxacillin - R: resistant - T: Tetracycline - F: Fusidic acid – I: Isoleucine – L: Leucine  
5 - NRCS: National Reference Center for Staphylococci - Oxa: Oxacillin - R: resistant  
6
